# Supplementary material for: Tracking total spending on tuberculosis by source and function in 135 low-income and middle-income countries, 2000–17: a financial modelling study
Source: PubMed Central journal article supplement (PMC7649746; doi:10.1016/s1473-3099(20)30124-9), 2020-08
Supplement: mmc1.pdf [file mmc1.pdf]

# THE LANCET

## Infectious Diseases

### Supplementary appendix

This appendix formed part of the original submission and has been peer reviewed.  
We post it as supplied by the authors.

Supplement to: Su Y, Baena IG, Harle AC, et al. Tracking total spending on tuberculosis by source and function in 135 low-income and middle-income countries, 2000–17: a financial modelling study. *Lancet Infect Dis* 2020; published online April 23.  
[http://dx.doi.org/10.1016/S1473-3099\(20\)30124-9](http://dx.doi.org/10.1016/S1473-3099(20)30124-9).

# Tracking total spending on tuberculosis by source and function in 135 low- and middle-income countries, 2000–2017: a financial modeling study

Version: Jan 31<sup>st</sup>, 2020

## Contents

|                |                                                                    |    |
|----------------|--------------------------------------------------------------------|----|
| S1.            | Summary statistics .....                                           | 2  |
| S2.            | Estimating tuberculosis domestic spending.....                     | 11 |
| S2.1.          | Modeling methods: ST-GPR .....                                     | 11 |
| S2.2.          | Data sources, assumptions, and estimates.....                      | 12 |
| <b>S2.2.1.</b> | <b>Pre-treatment</b> .....                                         | 13 |
| S2.2.2.        | <b>Notified cases</b> .....                                        | 14 |
| <b>S2.2.3.</b> | <b>Non-notified cases</b> .....                                    | 18 |
| S2.3.          | Modeling financing sources and functions .....                     | 22 |
| <b>S2.3.1.</b> | <b>Modeling total government spending on tuberculosis</b> .....    | 22 |
| <b>S2.3.2.</b> | <b>Modeling total out-of-pocket spending on tuberculosis</b> ..... | 23 |
| <b>S2.3.3.</b> | <b>Modeling prepaid private spending on tuberculosis</b> .....     | 23 |
| <b>S2.3.4.</b> | <b>Modeling spending on tuberculosis by function</b> .....         | 24 |
| S3.            | Currency Conversion .....                                          | 27 |
| S4.            | Sensitivity analysis.....                                          | 28 |
| S5.            | Results in purchasing power parity (PPP) dollars.....              | 31 |
| S6.            | How these estimates might be used.....                             | 37 |
|                | References for appendix .....                                      | 38 |

## S1. Summary statistics

**Table S1. Tuberculosis burden, income group, and GBD super region**

| Country                          | High tuberculosis burden | WB income group | GBD super region                                 |
|----------------------------------|--------------------------|-----------------|--------------------------------------------------|
| India                            | Yes                      | LM              | South Asia                                       |
| China                            | Yes                      | UM              | Southeast Asia, East Asia, and Oceania           |
| Angola                           | Yes                      | LM              | Sub-Saharan Africa                               |
| Bangladesh                       | Yes                      | LM              | South Asia                                       |
| Brazil                           | Yes                      | UM              | Latin America and Caribbean                      |
| Cambodia                         | Yes                      | LM              | Southeast Asia, East Asia, and Oceania           |
| Central African Republic         | Yes                      | L               | Sub-Saharan Africa                               |
| Congo                            | Yes                      | LM              | Sub-Saharan Africa                               |
| Democratic Republic of the Congo | Yes                      | L               | Sub-Saharan Africa                               |
| Ethiopia                         | Yes                      | L               | Sub-Saharan Africa                               |
| Indonesia                        | Yes                      | LM              | Southeast Asia, East Asia, and Oceania           |
| Kenya                            | Yes                      | LM              | Sub-Saharan Africa                               |
| Lesotho                          | Yes                      | LM              | Sub-Saharan Africa                               |
| Liberia                          | Yes                      | L               | Sub-Saharan Africa                               |
| Mozambique                       | Yes                      | L               | Sub-Saharan Africa                               |
| Myanmar                          | Yes                      | LM              | Southeast Asia, East Asia, and Oceania           |
| Namibia                          | Yes                      | UM              | Sub-Saharan Africa                               |
| Nigeria                          | Yes                      | LM              | Sub-Saharan Africa                               |
| North Korea                      | Yes                      | L               | Southeast Asia, East Asia, and Oceania           |
| Pakistan                         | Yes                      | LM              | South Asia                                       |
| Papua New Guinea                 | Yes                      | LM              | Southeast Asia, East Asia, and Oceania           |
| Philippines                      | Yes                      | LM              | Southeast Asia, East Asia, and Oceania           |
| Russian Federation               | Yes                      | UM              | Central Europe, Eastern Europe, and Central Asia |
| Sierra Leone                     | Yes                      | L               | Sub-Saharan Africa                               |
| South Africa                     | Yes                      | UM              | Sub-Saharan Africa                               |
| Tanzania                         | Yes                      | L               | Sub-Saharan Africa                               |
| Thailand                         | Yes                      | UM              | Southeast Asia, East Asia, and Oceania           |
| Vietnam                          | Yes                      | LM              | Southeast Asia, East Asia, and Oceania           |
| Zambia                           | Yes                      | LM              | Sub-Saharan Africa                               |
| Zimbabwe                         | Yes                      | LM              | Sub-Saharan Africa                               |
| Afghanistan                      | No                       | L               | North Africa and Middle East                     |
| Albania                          | No                       | UM              | Central Europe, Eastern Europe, and Central Asia |
| Algeria                          | No                       | UM              | North Africa and Middle East                     |
| American Samoa                   | No                       | UM              | Southeast Asia, East Asia, and Oceania           |
| Argentina                        | No                       | UM              | High-income                                      |

|                                |    |    |                                                  |
|--------------------------------|----|----|--------------------------------------------------|
| Armenia                        | No | UM | Central Europe, Eastern Europe, and Central Asia |
| Azerbaijan                     | No | UM | Central Europe, Eastern Europe, and Central Asia |
| Belarus                        | No | UM | Central Europe, Eastern Europe, and Central Asia |
| Belize                         | No | UM | Latin America and Caribbean                      |
| Benin                          | No | L  | Sub-Saharan Africa                               |
| Bhutan                         | No | LM | South Asia                                       |
| Bolivia                        | No | LM | Latin America and Caribbean                      |
| Bosnia and Herzegovina         | No | UM | Central Europe, Eastern Europe, and Central Asia |
| Botswana                       | No | UM | Sub-Saharan Africa                               |
| Bulgaria                       | No | UM | Central Europe, Eastern Europe, and Central Asia |
| Burkina Faso                   | No | L  | Sub-Saharan Africa                               |
| Burundi                        | No | L  | Sub-Saharan Africa                               |
| Cameroon                       | No | LM | Sub-Saharan Africa                               |
| Cape Verde                     | No | LM | Sub-Saharan Africa                               |
| Chad                           | No | L  | Sub-Saharan Africa                               |
| Colombia                       | No | UM | Latin America and Caribbean                      |
| Comoros                        | No | LM | Sub-Saharan Africa                               |
| Costa Rica                     | No | UM | Latin America and Caribbean                      |
| Cote d'Ivoire                  | No | LM | Sub-Saharan Africa                               |
| Cuba                           | No | UM | Latin America and Caribbean                      |
| Djibouti                       | No | LM | Sub-Saharan Africa                               |
| Dominica                       | No | UM | Latin America and Caribbean                      |
| Dominican Republic             | No | UM | Latin America and Caribbean                      |
| Ecuador                        | No | UM | Latin America and Caribbean                      |
| Egypt                          | No | LM | North Africa and Middle East                     |
| El Salvador                    | No | LM | Latin America and Caribbean                      |
| Equatorial Guinea              | No | UM | Sub-Saharan Africa                               |
| Eritrea                        | No | L  | Sub-Saharan Africa                               |
| Federated States of Micronesia | No | LM | Southeast Asia, East Asia, and Oceania           |
| Fiji                           | No | UM | Southeast Asia, East Asia, and Oceania           |
| Gabon                          | No | UM | Sub-Saharan Africa                               |
| Georgia                        | No | UM | Central Europe, Eastern Europe, and Central Asia |
| Ghana                          | No | LM | Sub-Saharan Africa                               |
| Grenada                        | No | UM | Latin America and Caribbean                      |
| Guatemala                      | No | UM | Latin America and Caribbean                      |
| Guinea                         | No | L  | Sub-Saharan Africa                               |
| Guinea-Bissau                  | No | L  | Sub-Saharan Africa                               |
| Guyana                         | No | UM | Latin America and Caribbean                      |
| Haiti                          | No | L  | Latin America and Caribbean                      |
| Honduras                       | No | LM | Latin America and Caribbean                      |
| Iran                           | No | UM | North Africa and Middle East                     |

|                                  |    |    |                                                  |
|----------------------------------|----|----|--------------------------------------------------|
| Iraq                             | No | UM | North Africa and Middle East                     |
| Jamaica                          | No | UM | Latin America and Caribbean                      |
| Jordan                           | No | UM | North Africa and Middle East                     |
| Kazakhstan                       | No | UM | Central Europe, Eastern Europe, and Central Asia |
| Kiribati                         | No | LM | Southeast Asia, East Asia, and Oceania           |
| Kyrgyzstan                       | No | LM | Central Europe, Eastern Europe, and Central Asia |
| Laos                             | No | LM | Southeast Asia, East Asia, and Oceania           |
| Lebanon                          | No | UM | North Africa and Middle East                     |
| Libya                            | No | UM | North Africa and Middle East                     |
| Macedonia                        | No | UM | Central Europe, Eastern Europe, and Central Asia |
| Madagascar                       | No | L  | Sub-Saharan Africa                               |
| Malawi                           | No | L  | Sub-Saharan Africa                               |
| Malaysia                         | No | UM | Southeast Asia, East Asia, and Oceania           |
| Maldives                         | No | UM | Southeast Asia, East Asia, and Oceania           |
| Mali                             | No | L  | Sub-Saharan Africa                               |
| Marshall Islands                 | No | UM | Southeast Asia, East Asia, and Oceania           |
| Mauritania                       | No | LM | Sub-Saharan Africa                               |
| Mauritius                        | No | UM | Southeast Asia, East Asia, and Oceania           |
| Mexico                           | No | UM | Latin America and Caribbean                      |
| Moldova                          | No | LM | Central Europe, Eastern Europe, and Central Asia |
| Mongolia                         | No | LM | Central Europe, Eastern Europe, and Central Asia |
| Montenegro                       | No | UM | Central Europe, Eastern Europe, and Central Asia |
| Morocco                          | No | LM | North Africa and Middle East                     |
| Nepal                            | No | L  | South Asia                                       |
| Nicaragua                        | No | LM | Latin America and Caribbean                      |
| Niger                            | No | L  | Sub-Saharan Africa                               |
| Palestine                        | No | LM | North Africa and Middle East                     |
| Paraguay                         | No | UM | Latin America and Caribbean                      |
| Peru                             | No | UM | Latin America and Caribbean                      |
| Romania                          | No | UM | Central Europe, Eastern Europe, and Central Asia |
| Rwanda                           | No | L  | Sub-Saharan Africa                               |
| Saint Lucia                      | No | UM | Latin America and Caribbean                      |
| Saint Vincent and the Grenadines | No | UM | Latin America and Caribbean                      |
| Samoa                            | No | UM | Southeast Asia, East Asia, and Oceania           |
| Sao Tome and Principe            | No | LM | Sub-Saharan Africa                               |
| Senegal                          | No | LM | Sub-Saharan Africa                               |
| Serbia                           | No | UM | Central Europe, Eastern Europe, and Central Asia |
| Solomon Islands                  | No | LM | Southeast Asia, East Asia, and Oceania           |

|              |    |    |                                                  |
|--------------|----|----|--------------------------------------------------|
| Somalia      | No | L  | Sub-Saharan Africa                               |
| South Sudan  | No | L  | Sub-Saharan Africa                               |
| Sri Lanka    | No | UM | Southeast Asia, East Asia, and Oceania           |
| Sudan        | No | LM | North Africa and Middle East                     |
| Suriname     | No | UM | Latin America and Caribbean                      |
| eSwatini     | No | LM | Sub-Saharan Africa                               |
| Syria        | No | L  | North Africa and Middle East                     |
| Tajikistan   | No | L  | Central Europe, Eastern Europe, and Central Asia |
| The Gambia   | No | L  | Sub-Saharan Africa                               |
| Timor-Leste  | No | LM | Southeast Asia, East Asia, and Oceania           |
| Togo         | No | L  | Sub-Saharan Africa                               |
| Tonga        | No | UM | Southeast Asia, East Asia, and Oceania           |
| Tunisia      | No | LM | North Africa and Middle East                     |
| Turkey       | No | UM | North Africa and Middle East                     |
| Turkmenistan | No | UM | Central Europe, Eastern Europe, and Central Asia |
| Uganda       | No | L  | Sub-Saharan Africa                               |
| Ukraine      | No | LM | Central Europe, Eastern Europe, and Central Asia |
| Uzbekistan   | No | LM | Central Europe, Eastern Europe, and Central Asia |
| Vanuatu      | No | LM | Southeast Asia, East Asia, and Oceania           |
| Venezuela    | No | UM | Latin America and Caribbean                      |
| Yemen        | No | L  | North Africa and Middle East                     |

**Table S2. Number of extracted tabulated data points by year**

| <b>Input data</b>                                     | <b>2000</b> | <b>2001</b> | <b>2002</b> | <b>2003</b> | <b>2004</b> | <b>2005</b> | <b>2006</b> | <b>2007</b> | <b>2008</b> | <b>2009</b> | <b>2010</b> | <b>2011</b> | <b>2012</b> | <b>2013</b> | <b>2014</b> | <b>2015</b> | <b>2016</b> | <b>2017</b> |
|-------------------------------------------------------|-------------|-------------|-------------|-------------|-------------|-------------|-------------|-------------|-------------|-------------|-------------|-------------|-------------|-------------|-------------|-------------|-------------|-------------|
| Government health spending on tuberculosis            | 2           | 7           | 5           | 5           | 32          | 48          | 48          | 59          | 61          | 30          | 11          | 18          | 42          | 60          | 57          | 45          | 45          | 4           |
| Prepaid private health spending on tuberculosis       | 0           | 0           | 0           | 0           | 0           | 0           | 0           | 0           | 0           | 1           | 3           | 5           | 10          | 8           | 7           | 8           | 4           | 0           |
| Out-of-pocket health spending on tuberculosis         | 0           | 0           | 1           | 0           | 0           | 1           | 1           | 2           | 0           | 1           | 3           | 5           | 14          | 12          | 12          | 8           | 4           | 0           |
| Government health spending                            | 135         | 135         | 135         | 135         | 135         | 135         | 135         | 135         | 135         | 135         | 135         | 135         | 135         | 135         | 135         | 135         | 135         | 135         |
| Out-of-pocket health spending                         | 135         | 135         | 135         | 135         | 135         | 135         | 135         | 135         | 135         | 135         | 135         | 135         | 135         | 135         | 135         | 135         | 135         | 135         |
| Domestic National Tuberculosis Programme spending     | 0           | 0           | 1           | 66          | 65          | 70          | 74          | 85          | 79          | 78          | 79          | 81          | 86          | 89          | 84          | 88          | 89          | 87          |
| TB case notifications                                 | 0           | 0           | 115         | 115         | 116         | 118         | 118         | 118         | 118         | 118         | 118         | 119         | 119         | 119         | 119         | 119         | 119         | 119         |
| MDR-TB cases starting treatment                       | 0           | 0           | 116         | 116         | 116         | 118         | 118         | 118         | 118         | 118         | 118         | 118         | 119         | 119         | 119         | 119         | 119         | 119         |
| Health facility visits per case - drug-susceptible TB | 0           | 0           | 116         | 116         | 116         | 118         | 118         | 118         | 118         | 118         | 118         | 118         | 119         | 119         | 119         | 119         | 119         | 119         |
| Health facility visits per case - drug-resistant TB   | 0           | 0           | 116         | 116         | 116         | 118         | 118         | 118         | 118         | 118         | 118         | 118         | 119         | 119         | 119         | 119         | 119         | 119         |
| Percent of cases admitted - drug-susceptible TB       | 0           | 0           | 115         | 115         | 115         | 117         | 117         | 117         | 117         | 117         | 117         | 117         | 118         | 118         | 118         | 118         | 118         | 118         |
| Percent of cases admitted - drug-resistant TB         | 0           | 0           | 116         | 116         | 116         | 118         | 118         | 118         | 118         | 118         | 118         | 118         | 119         | 119         | 119         | 119         | 119         | 119         |
| Cost of an outpatient visit                           | 0           | 0           | 0           | 0           | 0           | 0           | 0           | 0           | 0           | 0           | 0           | 0           | 0           | 0           | 0           | 0           | 0           | 119         |
| Cost of an inpatient bedday                           | 0           | 0           | 0           | 0           | 0           | 0           | 0           | 0           | 0           | 0           | 0           | 0           | 0           | 0           | 0           | 0           | 0           | 119         |
| Incident cases - drug-susceptible TB                  | 135         | 135         | 135         | 135         | 135         | 135         | 135         | 135         | 135         | 135         | 135         | 135         | 135         | 135         | 135         | 135         | 135         | 135         |
| Incident cases - drug-resistant TB                    | 135         | 135         | 135         | 135         | 135         | 135         | 135         | 135         | 135         | 135         | 135         | 135         | 135         | 135         | 135         | 135         | 135         | 135         |
| Government health spending on TB                      | 2           | 7           | 5           | 5           | 32          | 48          | 48          | 59          | 61          | 30          | 11          | 18          | 42          | 60          | 57          | 45          | 45          | 4           |
| Prepaid private health spending on TB                 | 0           | 0           | 0           | 0           | 0           | 0           | 0           | 0           | 0           | 1           | 3           | 5           | 10          | 8           | 7           | 8           | 4           | 0           |

|                                                    |   |   |   |    |    |    |    |    |    |    |    |    |    |    |    |    |    |    |
|----------------------------------------------------|---|---|---|----|----|----|----|----|----|----|----|----|----|----|----|----|----|----|
| Out-of-pocket health spending on TB                | 0 | 0 | 1 | 0  | 0  | 1  | 1  | 2  | 0  | 1  | 3  | 5  | 14 | 12 | 12 | 8  | 4  | 0  |
| Domestic National Tuberculosis Programme spending  | 0 | 0 | 1 | 66 | 65 | 70 | 74 | 85 | 79 | 78 | 79 | 81 | 86 | 89 | 84 | 88 | 89 | 87 |
| Total direct medical costs; TB patient perspective | 1 | 2 | 1 | 2  | 0  | 0  | 1  | 3  | 3  | 0  | 5  | 0  | 1  | 1  | 1  | 0  | 2  | 2  |



**Table S3. Summary statistics by input data units and sources**

| Input data                                            | Source                                  | Unit                        | Observations | Mean | Median | Standard deviation |
|-------------------------------------------------------|-----------------------------------------|-----------------------------|--------------|------|--------|--------------------|
| Government health spending on TB                      | National Health Accounts                | Millions of 2019 US Dollars | 111          | 11   | 2      | 34                 |
| Prepaid private health spending on TB                 | National Health Accounts                | Millions of 2019 US Dollars | 46           | 1    | 0      | 3                  |
| Out-of-pocket health spending on TB                   | National Health Accounts                | Millions of 2019 US Dollars | 64           | 44   | 1      | 126                |
| Government health spending on TB                      | Global Fund Proposals                   | Millions of 2019 US Dollars | 261          | 16   | 2      | 73                 |
| Government health spending on TB                      | Global Fund Concept Notes               | Millions of 2019 US Dollars | 34           | 10   | 3      | 16                 |
| Government health spending on TB                      | National TB Programme reports           | Millions of 2019 US Dollars | 9            | 47   | 6      | 51                 |
| Government health spending on TB                      | Ministry of Health reports              | Millions of 2019 US Dollars | 14           | 1    | 1      | 0                  |
| Government health spending on TB                      | Global Fund Funding Landscape Documents | Millions of 2019 US Dollars | 7            | 2    | 3      | 2                  |
| Government health spending on TB                      | WHO Global Health Expenditure Database  | Millions of 2019 US Dollars | 139          | 11   | 2      | 32                 |
| Government health spending                            | IHME                                    | Millions of 2019 US Dollars | 2430         | 3558 | 252    | 17968              |
| Out-of-pocket health spending                         | IHME                                    | Millions of 2019 US Dollars | 2430         | 2951 | 336    | 13384              |
| Domestic National TB Programme spending               | WHO                                     | Millions of 2019 US Dollars | 1201         | 21   | 1      | 129                |
| TB case notifications                                 | WHO                                     | Thousands                   | 1887         | 49   | 8      | 167                |
| MDR-TB cases starting treatment                       | WHO                                     | Thousands                   | 1888         | 1    | 0      | 2                  |
| Health facility visits per case - drug-susceptible TB | WHO                                     | Visits per case             | 1888         | 65   | 64     | 72                 |
| Health facility visits per case - drug-resistant TB   | WHO                                     | Visits per case             | 1888         | 190  | 24     | 248                |
| Percent of cases admitted - drug-susceptible TB       | WHO                                     | Percent                     | 1872         | 28   | 10     | 33                 |
| Percent of cases admitted - drug-resistant TB         | WHO                                     | Percent                     | 1888         | 62   | 90     | 42                 |
| Cost of an outpatient visit                           | WHO CHOICE                              | 2019 US Dollars             | 119          | 36   | 4      | 325                |
| Cost of an inpatient bed day                          | WHO CHOICE                              | 2019 US Dollars             | 119          | 173  | 25     | 1425               |
| Incident cases - drug-susceptible TB                  | IHME                                    | Thousands                   | 2430         | 74   | 10     | 266                |
| Incident cases - drug-resistant TB                    | IHME                                    | Thousands                   | 2430         | 4    | 0      | 17                 |
| Total direct medical costs; TB patient perspective    | Peer-reviewed Literature                | 2019 US Dollars             | 25           | 2059 | 60     | 9630               |

**Table S4. Total direct medical costs for tuberculosis patients extracted from peer-reviewed literature**

| Country            | Survey Year | Drug Resistance | Direct medical costs excluding tuberculosis drugs (2019 USD) | Study            |
|--------------------|-------------|-----------------|--------------------------------------------------------------|------------------|
| Ethiopia           | 2013        | MDR             | 139.02                                                       | Collins, 2014    |
| India              | 2016        | DS              | 0                                                            | Fuady, 2018      |
| India              | 2016        | MDR             | 9.6                                                          | Fuady, 2018      |
| Kenya              | 2017        | DS              | 9.57                                                         |                  |
| Kenya              | 2017        | MDR             | 8.09                                                         |                  |
| Latvia             | 2010-2011   | MDR             | 48274.69                                                     | Miller, 2013     |
| Mongolia           | 2018        | DS              | 221.03                                                       | Oh, 2018         |
| Mongolia           | 2018        | MDR             | 450.28                                                       | Oh, 2018         |
| South Korea        | 1999-2004   | DS              | 679.35                                                       | Kang, 2006       |
| South Korea        | 1999-2004   | MDR             | 18509.21                                                     | Kang, 2006       |
| Vietnam            | 2018        | DS              | 137.28                                                       | Oh, 2018         |
| Vietnam            | 2018        | MDR             | 803.18                                                       | Oh, 2018         |
| Benin              | 2008-2009   | DS              | 26.75                                                        | Laokri, 2014     |
| Brazil             | 2007-2008   | DS              | 106.37                                                       | Steffen, 2010    |
| China              | 2002-2005   | DS              | 395.23                                                       | Jackson, 2006    |
| China              | 2012        | DS              | 765.56                                                       | Zhou, 2016       |
| Dominican Republic | 2010        | DS              | 14.87                                                        | Mauch, 2013      |
| Ecuador            | 2007        | DS              | 385.83                                                       | Rouzier, 2010    |
| Ecuador            | 2007        | MDR             | 410.31                                                       | Rouzier, 2010    |
| Ghana              | 2010        | DS              | 20.81                                                        | Mauch, 2013      |
| Haiti              | 2003        | DS              | 328.45                                                       | Jacquet, 2006    |
| India              | 2000        | DS              | 0.36                                                         | Muniyandi, 2005  |
| Malaysia           | 2010-2011   | DS              | 30.49                                                        | Atif, 2014       |
| Nepal              | 2001-2002   | DS              | 21.1                                                         | Karki, 2007      |
| Nigeria            | 2008        | DS              | 18.74                                                        | Umar, 2012       |
| Tajikistan         | 2006-2007   | DS              | 60.37                                                        | Aye, 2010        |
| Thailand           | 2014-2015   | DS              | 59.72                                                        | Tanvejsilp, 2018 |
| Ukraine            | 2001        | DS              | 92.21                                                        | Vassal, 2008     |
| Ukraine            | 2003        | DS              | 77.11                                                        | Vassal, 2008     |
| Vietnam            | 2010        | DS              | 28.9                                                         | Mauch, 2013      |
| Yemen              | 2008-2009   | DS              | 201.96                                                       | Othman, 2010     |

**Table S5. Dominating financing source among 30 high burden countries**

| <b>30 High Burden Countries</b>       |             |                                |                                    |                                                                   |
|---------------------------------------|-------------|--------------------------------|------------------------------------|-------------------------------------------------------------------|
| <b>Country</b>                        | <b>ISO3</b> | <b>World Bank income group</b> | <b>Dominating financing source</b> | <b>Percent of total health spending on TB from primary source</b> |
| Angola                                | AGO         | LM                             | Government                         | 60.0 (49.5-69.0)                                                  |
| Bangladesh                            | BGD         | LM                             | Development assistance for health  | 53.9 (45.1-62.3)                                                  |
| Brazil                                | BRA         | UM                             | Government                         | 91.5 (83.8-96.3)                                                  |
| Cambodia                              | KHM         | LM                             | Government                         | 67.8 (63.8-71.4)                                                  |
| Central African Republic              | CAF         | L                              | Development assistance for health  | 65.2 (60.4-69.4)                                                  |
| China                                 | CHN         | UM                             | Government                         | 79.3 (65.6-89.5)                                                  |
| Congo                                 | COG         | LM                             | Government                         | 45.3 (35.6-55.1)                                                  |
| Democratic People's Republic of Korea | PRK         | L                              | Government                         | 95.5 (91.1-98.0)                                                  |
| Democratic Republic of the Congo      | COD         | L                              | Out-of-pocket                      | 52.5 (41.9-62.2)                                                  |
| Ethiopia                              | ETH         | L                              | Government                         | 41.5 (33.9-49.5)                                                  |
| India                                 | IND         | LM                             | Government                         | 47.7 (33.7-61.2)                                                  |
| Indonesia                             | IDN         | LM                             | Government                         | 56.8 (45.8-66.9)                                                  |
| Kenya                                 | KEN         | LM                             | Development assistance for health  | 44.1 (37.0-50.9)                                                  |
| Lesotho                               | LSO         | LM                             | Development assistance for health  | 70.1 (66.4-73.7)                                                  |
| Liberia                               | LBR         | L                              | Government                         | 33.1 (23.6-43.3)                                                  |
| Mozambique                            | MOZ         | L                              | Development assistance for health  | 40.1 (33.9-46.6)                                                  |
| Myanmar                               | MMR         | LM                             | Development assistance for health  | 58.5 (46.8-67.7)                                                  |
| Namibia                               | NAM         | UM                             | Government                         | 75.7 (71.5-79.5)                                                  |
| Nigeria                               | NGA         | LM                             | Out-of-pocket                      | 51.6 (35.1-68.9)                                                  |
| Pakistan                              | PAK         | LM                             | Out-of-pocket                      | 43.8 (28.5-58.7)                                                  |
| Papua New Guinea                      | PNG         | LM                             | Government                         | 57.5 (51.3-63.9)                                                  |
| Philippines                           | PHL         | LM                             | Government                         | 72.9 (67.0-77.8)                                                  |
| Russian Federation                    | RUS         | UM                             | Government                         | 90.0 (83.3-94.8)                                                  |
| Sierra Leone                          | SLE         | L                              | Government                         | 71.6 (67.4-75.0)                                                  |
| South Africa                          | ZAF         | UM                             | Government                         | 67.3 (59.3-74.4)                                                  |
| Thailand                              | THA         | UM                             | Government                         | 64.5 (53.5-73.9)                                                  |
| United Republic of Tanzania           | TZA         | L                              | Out-of-pocket                      | 38.9 (31.5-46.7)                                                  |
| Viet Nam                              | VNM         | LM                             | Government                         | 60.1 (48.1-69.8)                                                  |
| Zambia                                | ZMB         | LM                             | Development assistance for health  | 56.3 (53.0-59.3)                                                  |
| Zimbabwe                              | ZWE         | LM                             | Out-of-pocket                      | 37.0 (29.6-45.4)                                                  |

## S2. Estimating tuberculosis domestic spending

### S2.1. Modeling methods: ST-GPR

In order to produce a complete time series of estimates that are comparable among countries and over time, we used spatiotemporal Gaussian process regression (ST-GPR) to estimate government, out-of-pocket, and prepaid private spending on tuberculosis (TB). Overall, we used primary data when available, and relied on ST-GPR to fill missingness when there was no data. ST-GPR is a modeling framework developed by IHME, used extensively in the Global Burden of Disease Study (GBD) and resource tracking. ST-GPR involves in three main steps: 1) Linear modeling with covariates to produce a complete time-series, 2) spatiotemporal smoothing, and 3) Gaussian process regression (GPR). The GPR model utilizes Bayesian inference to update predicted health spending as a posterior in Bayes rule by combining data and a prior probability distribution over parameters in mean, covariance function, and the regression model. For each model, we identified covariates based upon a 10-fold cross validation with out-of-sample tests to avoid over-fit or under-fit, and then selected the model with the smallest root mean square error.

In ST-GPR, there is the option to smooth across countries, which is more applicable for estimating disease burden. In financial estimation, we often do not often smooth across space. Health financing variables vary dramatically across countries because health systems are so distinct. We rely relatively more on the underlying data, the linear fit from the first stage of the model, and smoothing across time. In addition, to reflect reforms and fluctuations in National Tuberculosis Programme (NTP) investment over time, we set a low GPR scale to lower the correlation between data points through time. Finally, we set a low amplitude to narrow variance for countries with good primary data (e.g., country-year>5). Table S5 below shows the parameters used for ST-GPR models run in this analysis:

**Table S5. ST-GPR parameter settings for domestic health spending on tuberculosis models**

| Model                                           | Lambda | Omega | Zeta  | GPR amp factor | GPR scale |
|-------------------------------------------------|--------|-------|-------|----------------|-----------|
| Government health spending on tuberculosis      | 0.5    | 0.2   | 0.001 | 1              | 1         |
| Out-of-pocket health spending on tuberculosis   | 0.5    | 0.2   | 0.001 | 1              | 1         |
| Prepaid private health spending on tuberculosis | 0.5    | 0.2   | 0.001 | 1              | 5         |

## S2.2. Data sources, assumptions, and estimates

We assume all pre-diagnosis outpatient spending is sourced with the same proportions of government, out-of-pocket, and prepaid private spending as average patients in health systems. For notified cases, we assume diagnostic spending and TB medicine spending are covered by NTP. For non-notified cases, we assume that patients do not access regulated diagnostics, and that TB medicines are sourced in the same way as average patients in health systems. We assume that outpatient and inpatient care are fully covered by government for notified TB cases. For non-notified cases, we assume inpatient and outpatient spending is sourced in the same way as average patients in health systems. As such, the equation below illustrates the components of domestic spending on TB:

$$\begin{aligned}
 & \textit{TB domestic spending} \\
 &= \textit{Pre-diagnosis outpatient spending}_{\textit{incident cases}} \\
 &+ \textit{Diagnostic spending}_{\textit{notified|non-notified}} + \textit{Drug spending}_{\textit{notified|non-notified}} \\
 &+ \textit{Spending on healthcare utilization in treatment}_{\textit{notified|non-notified}}
 \end{aligned}$$

To estimate government health spending, out-of-pocket health spending, and prepaid private health spending on TB, we created estimates using costs and volume of TB health services. The equations for our cost-volume estimates for each source are as follows:

$$\begin{aligned}
 \textit{Government}_{\textit{TB}} \\
 &= \textit{Government}_{\textit{pre-treatment}} + \textit{Government}_{\textit{notified cases}} \\
 &+ \textit{Government}_{\textit{non-notified cases}}
 \end{aligned}$$

$$\textit{Out-of-pocket}_{\textit{TB}} = \textit{Out-of-pocket}_{\textit{pre-treatment}} + \textit{Out-of-pocket}_{\textit{non-notified cases}}$$

$$\textit{Prepaid private}_{\textit{TB}} = \textit{Prepaid private}_{\textit{pre-treatment}} + \textit{Prepaid private}_{\textit{non-notified cases}}$$

### S2.2.1. Pre-treatment

All TB patients are grouped into two types: drug susceptible patients starting first-line TB treatment and drug resistant patients starting second-line TB treatment. We used different healthcare utilisation quantities and unit cost per patient for drug susceptible- and drug-resistant-TB patients to estimate health system spending. Drug resistant TB includes: RR-TB (Rifampicin-resistant), MDR-TB (Rifampicin- and isoniazid-resistant), and XDR-TB (Extensively drug-resistant TB (XDR TB) is a rare type of multidrug-resistant tuberculosis (MDR TB) that is resistant to isoniazid and rifampin, plus any fluoroquinolone (FQ) and at least one of three injectable second-line drugs (i.e., amikacin, kanamycin, or capreomycin). In this study, we refer all drug resistant tuberculosis as MDR-TB.

We assumed pre-treatment spending was primarily on outpatient care. Pre-treatment visits per patient data were taken from World Health Organization (WHO) patient cost surveys as well as peer-reviewed literature<sup>1,2</sup>. As a function of our assumption that all incident cases sought treatment, we assumed that all incident cases had the same utilisation of pre-treatment visits. We assumed that notified and non-notified cases had the same utilisation of outpatient visits before receiving treatment. To estimate uncertainty around pre-treatment visits, we created 1,000 draws using the 12 data points for each of drug-susceptible (DS) and MDR TB. As such, the data we used was not country-specific. Per the conceptual framework, we assume the spending on pre-treatment care is sourced similarly to the health sector.

To get pre-treatment spending for government health spending, out-of-pocket health spending, and prepaid private health spending, we used the equations below:

$$\begin{aligned} & \textit{Government}_{pre-treatment} \\ &= \textit{incident cases} * \textit{pre-treatment visits per patient}_{DS|MDR} \\ & * \textit{outpatient visit unit cost} * \frac{\textit{Government outpatient spending}}{\textit{Domestic outpatient spending}} \end{aligned}$$

$$\begin{aligned} & \textit{Out-of-pocket}_{pre-treatment} \\ &= \textit{incident cases} * \textit{pre-treatment visits per patient}_{DS|MDR} \\ & * \textit{outpatient visit unit cost} * \frac{\textit{Out-of-pocket outpatient spending}}{\textit{Domestic outpatient spending}} \end{aligned}$$

$$\begin{aligned}
& \textit{Prepaid private}_{pre-treatment} \\
& = \textit{incident cases} * \textit{pre-treatment visits per patient}_{DS|MDR} \\
& * \textit{outpatient visit unit cost} * \frac{\textit{Prepaid private outpatient spending}}{\textit{Domestic outpatient spending}}
\end{aligned}$$

To ensure that the medical costs reflected the health system perspective, we adjusted the unit costs with the fractions of outpatient spending sourced by government, out-of-pocket, and prepaid private health spending. We modelled 630, 493, and 486 country-year data points from National Health Accounts (NHAs) respectively, logit-transformed, with ST-GPR. Each model used natural log-transformed lag-distributed income (LDI) per capita from GBD,<sup>3</sup> random effects on country, and the logit-transformed fraction of total health spending per each source ( $\frac{\textit{Government health spending}}{\textit{Domestic health spending}}$ ,  $\frac{\textit{Out-of-pocket health spending}}{\textit{Domestic health spending}}$ , and  $\frac{\textit{Prepaid private health spending}}{\textit{Domestic health spending}}$ ) from the GBD Health Financing Collaborator Network<sup>4</sup> as covariates.

### S2.2.2. Notified cases

We assumed that all spending on notified cases was sourced by the government. While we found evidence that indicated that some patients who were treated through National Tuberculosis Programmes incurred out-of-pocket costs, the evidence was limited and the costs were often closer to 0 than to the pattern of out-of-pocket spending in the health sector as a whole. See Table S5 for studies we reviewed on out-of-pocket expenditures incurred by patients in the NTP setting<sup>1, 2,5-9,10-12, 13-21</sup>.

**Table S6. Out-of-pocket costs incurred by patients treated in a National Tuberculosis Programme setting from peer-reviewed literature**

| Study                | Country            | Survey Year | Drug Resistance | Total Direct Medical Costs During Treatment (2019 USD) |        | Notes             |
|----------------------|--------------------|-------------|-----------------|--------------------------------------------------------|--------|-------------------|
|                      |                    |             |                 | Measu                                                  |        |                   |
| Anathakrishnan, 2012 | India              | 2007        | DS              | 0.6                                                    | mean   |                   |
| Aspler, 2008         | Zambia             | 2006        | DS              | 1.42                                                   | median |                   |
| Asres, 2018          | Ethiopia           | 2015        | DS              | \$ -                                                   | median |                   |
| Asres, 2018          | Ethiopia           | 2015        | DS              | 4.62                                                   | mean   |                   |
| Fuady, 2018          | Indonesia          | 2016        | DS              | \$ -                                                   | median |                   |
| Fuady, 2018          | Indonesia          | 2016        | MDR             | 15.41                                                  | median |                   |
| Jackson, 2006        | China              | 2002-2005   | DS              | 375.39                                                 | mean   |                   |
| Jacquet, 2006        | Haiti              | 2003        | DS              | 351.62                                                 | mean   |                   |
| Jacquet, 2006        | Haiti              | 2003        | DS              | 872.92                                                 | mean   |                   |
| John, 2009           | India              | 2007        | DS              | 0.03                                                   | mean   |                   |
| Laokri, 2014         | Benin              | 2008        | DS              | 2.98                                                   | median |                   |
| Mahendradhata, 2010  | Indonesia          | 2004-2005   | DS              | 3.95                                                   | median |                   |
| Collins, 2014        | Ethiopia           | 2013        | MDR             | 46.59                                                  | median |                   |
| Mauch, 2013          | Dominican Republic | 2010        | DS              | 7.58                                                   | median |                   |
| Mauch, 2013          | Ghana              | 2010        | DS              | 15.12                                                  | median |                   |
| Mauch, 2013          | Ghana              | 2010        | DS              | 81.46                                                  | mean   |                   |
| Mauch, 2013          | Vietnam            | 2010        | DS              | 17.61                                                  | median |                   |
| Muniyandi, 2005      | India              | 2000        | DS              | \$ -                                                   | median |                   |
| Othman, 2010         | Yemen              | 2008-2009   | DS              | 62.93                                                  | mean   | Pulmonary         |
| Othman, 2010         | Yemen              | 2008-2009   | DS              | 71.82                                                  | mean   | Extra-pulmonary   |
| Pantoja, 2009        | India              | 2005        | DS              | 21.36                                                  | mean   |                   |
| Pedrazzoli, 2018     | Ghana              | 2016        | DS              | 93.36                                                  | median |                   |
| Pedrazzoli, 2018     | Ghana              | 2016        | MDR             | 38.53                                                  | median |                   |
| Pichenda, 2012       | Cambodia           | 2008-2009   | DS              | 0.52                                                   | mean   | HIV-negative      |
| Pichenda, 2012       | Cambodia           | 2008-2009   | DS              | \$ -                                                   | mean   | HIV-positive      |
| Pichenda, 2012       | Cambodia           | 2008-2009   | MDR             | \$ -                                                   | mean   |                   |
| Prasanna, 2018       | India              | 2016-2017   | DS              | \$ -                                                   | median |                   |
| Rouzier, 2010        | Ecuador            | 2007        | DS              | 164.14                                                 | mean   |                   |
| Rouzier, 2010        | Ecuador            | 2007        | MDR             | 418.61                                                 | mean   |                   |
| Vassal, 2008         | Ukraine            | 2001        | DS              | 3.54                                                   | mean   | Mariupol, Ukraine |



|              |         |      |    |         |        |                    |
|--------------|---------|------|----|---------|--------|--------------------|
| Vassal, 2008 | Ukraine | 2003 | DS | 2.27    | mean   | Mariupol, Ukraine  |
| Vassal, 2008 | Ukraine | 2001 | DS | 108.39  | mean   | Kyiv City, Ukraine |
| Vassal, 2008 | Ukraine | 2003 | DS | 42.12   | mean   | Kyiv City, Ukraine |
| Vassal, 2008 | Ukraine | 2003 | DS | 2615.26 | mean   | Kyiv City, Ukraine |
| Vassal, 2008 | Ukraine | 2004 | DS | 1440.34 | mean   | Kyiv City, Ukraine |
| Vassal, 2008 | Ukraine | 2001 | DS | 2105.24 | mean   | Mariupol, Ukraine  |
| Vassal, 2008 | Ukraine | 2003 | DS | 1417.7  | mean   | Mariupol, Ukraine  |
| Xu, 2006     | China   | 2002 | DS | 23.97   | mean   | Jianhu province    |
| Xu, 2006     | China   | 2002 | DS | 38.89   | median | Jianhu province    |
| Xu, 2006     | China   | 2002 | DS | 187.53  | mean   | Funing province    |
| Xu, 2006     | China   | 2002 | DS | 151.04  | median | Funing province    |
| Yuan, 2017   | China   |      | DS | 153.34  | median |                    |
| Zhou, 2016   | China   | 2012 | DS | 1004.23 | mean   |                    |
| Zhou, 2019   | China   | 2014 | DS | 227.27  | median |                    |

The equation below is the simplest form of calculating *Government<sub>notified cases</sub>*:

$$\begin{aligned}
 & \textit{Government}_{notified\ cases} \\
 & = \textit{National Tuberculosis Program spending} \\
 & + \textit{Government patient care}_{notified\ cases}
 \end{aligned}$$

We utilized *National Tuberculosis Program spending* expenditure data reported to the WHO<sup>22</sup>. To fill any missing data, we used ST-GPR to model the reported NTP spending as a logit-transformed fraction of total government health expenditure from the GBD Health Financing Collaborator Network<sup>4</sup> with the following covariates: MDR patients starting treatment through NTP from the WHO Global TB Database<sup>22</sup> and the logit-transformed proportion of total health expenditure sourced by the government from the GBD Health Financing Collaborator Network<sup>4</sup>, with random effects on country, region, and GBD super region. The expenditures reported by National Tuberculosis Programmes typically include medication, diagnostics, staff, and other program expenditures.

*Government patient care*<sub>notified cases</sub> is comprised of inpatient and outpatient spending for patients that are notified to the NTP. We assume that all drug, diagnostic, and patient tracing costs are borne by the NTP for notified cases. The equation below describes how *Government patient care*<sub>notified cases</sub> is estimated:

$$\begin{aligned} & \textit{Government patient care}_{\textit{notified cases}} \\ &= \textit{outpatient spending on notified cases}_{DS|MDR} \\ &+ \textit{inpatient spending on notified cases}_{DS|MDR} \end{aligned}$$

In the above equation and all following equations, the  $_{DS|MDR}$  subscript indicates a variable that has unique values for both drug-susceptible and drug-resistant TB.

The equations below illustrate how each of the components of *Government patient care*<sub>DS|MDR</sub> are calculated:

$$\begin{aligned} & \textit{Outpatient spending on notified cases}_{DS|MDR} \\ &= \textit{notified cases}_{DS|MDR} * \textit{outpatient visit unit cost} \\ & * \textit{average visits per notified case}_{DS|MDR} \end{aligned}$$

$$\begin{aligned} & \textit{Inpatient spending on notified cases}_{DS|MDR} = \textit{notified cases}_{DS|MDR} * \\ & \textit{bed day unit cost}_{DS|MDR} * \textit{average inpatient duration per case}_{DS|MDR} * \frac{\textit{inpatient cases}}{\textit{notified cases}_{DS|MDR}} \end{aligned}$$

*Notified cases*<sub>DS|MDR</sub> was sourced from the WHO Global TB Database.<sup>22</sup> We used ST-GPR to fill any missing data points for these utilisation variables and create a complete time series of estimates.

All utilisation variables - *average visits per notified case*<sub>DS|MDR</sub>, *average inpatient duration per case*<sub>DS|MDR</sub>, and  $\frac{\textit{inpatient cases}}{\textit{notified cases}_{DS|MDR}}$  - were also downloaded from the WHO Global TB Database<sup>22</sup> and modelled with ST-GPR. Unit costs - *outpatient visit unit cost* and

*bed day unit cost*<sub>DS|MDR</sub> – were sourced from WHO CHOICE<sup>23</sup> and modelled in ST-GPR using outpatient visit and inpatient admission unit costs from Moses et al.<sup>24</sup> as covariates respectively.

We used data on inpatient and outpatient spending for tuberculosis sourced from NHAs to fill in *outpatient spending on notified cases*<sub>DS|MDR</sub> and *inpatient spending on notified cases*<sub>DS|MDR</sub>. We multiplied inpatient spending and outpatient spending on TB from the NHAs by the fraction of *Government patient care*<sub>notified cases</sub> on drug-susceptible and drug-resistant TB from our estimates using cost and volume variables to get inpatient and outpatient spending specific to drug-susceptible and drug-resistant TB. To create a full time series for the data from NHAs, we extrapolated the first and last data points in the time series using the annual rate of change for our estimates using the cost and volume components. To fill any missing country-years between the first and last points in the time series, we used linear interpolation.

### S2.2.3. Non-notified cases

*Non-notified cases*<sub>DS|MDR</sub> can be quantified as *incident cases*<sub>DS|MDR</sub> – *notified cases*<sub>DS|MDR</sub>. Per Table 1 in the manuscript, we assume that inpatient and outpatient care for non-notified cases is sourced similarly to the health system as a whole. We do not account for any spending on drugs sourced by the government through social insurance for non-notified cases, as we assume that government spending on drugs for TB is accounted for in NTP spending.

As such, the equations below illustrate how we calculated spending on non-notified cases by source:

$$\begin{aligned}
 & \textit{Government}_{non-notified} \\
 & = \textit{Government outpatient spending}_{non-notified cases} \\
 & + \textit{Government inpatient spending}_{non-notified cases}
 \end{aligned}$$

$$\begin{aligned}
 & \textit{Out-of-pocket}_{non-notified} \\
 & = \textit{Out-of-pocket outpatient spending}_{non-notified cases} \\
 & + \textit{Out-of-pocket inpatient spending}_{non-notified cases} \\
 & + \textit{Out-of-pocket drug spending}_{non-notified cases}
 \end{aligned}$$

$$\begin{aligned}
& \text{Prepaid private}_{non-notified} \\
& = \text{Prepaid private outpatient spending}_{non-notified cases} \\
& + \text{Prepaid private inpatient spending}_{non-notified cases} \\
& + \text{Prepaid private drug spending}_{non-notified cases}
\end{aligned}$$

Outpatient spending by source is calculated as follows:

$$\begin{aligned}
& \text{Government outpatient spending}_{non-notified cases} \\
& = \text{non-notified cases}_{DS|MDR} * \text{outpatient visit unit cost} \\
& * \text{average visits per notified case}_{DS|MDR} * \frac{\text{Government outpatient spending}}{\text{Domestic outpatient spending}}
\end{aligned}$$

$$\begin{aligned}
& \text{Out-of-pocket outpatient spending}_{non-notified cases} \\
& = \text{non-notified cases}_{DS|MDR} * \text{outpatient visit unit cost} \\
& * \text{average visits per notified case}_{DS|MDR} * \frac{\text{Out-of-pocket outpatient spending}}{\text{Domestic outpatient spending}}
\end{aligned}$$

$$\begin{aligned}
& \text{Prepaid private spending}_{non-notified cases} \\
& = \text{non-notified cases}_{DS|MDR} * \text{outpatient visit unit cost} \\
& * \text{average visits per notified case}_{DS|MDR} * \frac{\text{Prepaid private outpatient spending}}{\text{Domestic outpatient spending}}
\end{aligned}$$

Inpatient spending by source for non-notified cases is calculated as follows:

$$\begin{aligned}
& \text{Government inpatient spending}_{non-notified cases} \\
& = \text{non-notified cases}_{DS|MDR} * \text{bed day unit cost}_{DS|MDR} \\
& * \text{average inpatient duration per case}_{DS|MDR} * \frac{\text{inpatient cases}_{DS|MDR}}{\text{notified cases}_{DS|MDR}} \\
& * \frac{\text{Government inpatient spending}}{\text{Domestic inpatient spending}}
\end{aligned}$$

$$\begin{aligned}
& \text{Out-of-pocket inpatient spending}_{\text{non-notified cases}} \\
& = \text{non-notified cases}_{\text{DS|MDR}} * \text{bed day unit cost}_{\text{DS|MDR}} \\
& * \text{average inpatient duration per case}_{\text{DS|MDR}} * \frac{\text{inpatient cases}}{\text{notified cases}_{\text{DS|MDR}}} \\
& * \frac{\text{Out-of-pocket inpatient spending}}{\text{Domestic inpatient spending}}
\end{aligned}$$

$$\begin{aligned}
& \text{Prepaid private inpatient spending}_{\text{non-notified cases}} \\
& = \text{non-notified cases}_{\text{DS|MDR}} * \text{bed day unit cost}_{\text{DS|MDR}} \\
& * \text{average inpatient duration per case}_{\text{DS|MDR}} * \frac{\text{inpatient cases}}{\text{notified cases}_{\text{DS|MDR}}} \\
& * \frac{\text{Prepaid private inpatient spending}}{\text{Domestic inpatient spending}}
\end{aligned}$$

All unit cost and utilisation variables for inpatient and outpatient spending for non-notified cases are the same as the ones used for notified cases. We assumed that health care utilisation patterns were the same for notified cases and non-notified cases. Alternative scenarios are addressed in the sensitivity analysis. To ensure that the inpatient medical costs reflected the health system perspective, we adjusted the inpatient unit costs with the fractions of  $\frac{\text{Government inpatient spend}}{\text{Domestic inpatient spend}}$ ,  $\frac{\text{Out-of-pocket inpatient spend}}{\text{Domestic inpatient spend}}$ , and  $\frac{\text{Prepaid private inpatient spend}}{\text{Domestic inpatient spend}}$ . We modelled 625, 491, and 484 country-year data points from NHAs with ST-GPR. Each model used natural log-transformed LDI per capita from GBD<sup>3</sup>, random effects on country, and the logit-transformed fraction of total health spending per each source ( $\frac{\text{Government health spending}}{\text{Domestic health spending}}$ ,  $\frac{\text{Out-of-pocket health spending}}{\text{Domestic health spending}}$ , and  $\frac{\text{Prepaid private health spending}}{\text{Domestic health spending}}$ ) from the GBD Health Financing Collaborator Network<sup>4</sup> as covariates.

For out-of-pocket and prepaid private spending, we calculated drug spending as follows:

$$\begin{aligned}
& \text{Out-of-pocket drug spending}_{\text{non-notified cases}} \\
& = \text{non-notified cases}_{\text{DS|MDR}} * \text{drug cost per patient}_{\text{DS|MDR}} \\
& * \frac{\text{Out-of-pocket medical goods spending}}{\text{Domestic medical goods spending}}
\end{aligned}$$

*Prepaid private drug spending*<sub>non-notified cases</sub>

$$= \text{non-notified cases}_{DS|MDR} * \text{drug cost per patient}_{DS|MDR} \\ * \frac{\text{Prepaid private medical goods spending}}{\text{Domestic medical goods spending}}$$

*Drug cost per patient*<sub>DS|MDR</sub> data was from the WHO Global TB database<sup>22</sup>. This data represents the reported cost per patient for drugs from the NTP perspective, excluding buffer stock. Reported data excluding buffer stock was only reported from 2015 onward. As such, we modelled the natural log-transformed reported costs per patient in ST-GPR, using the average drug cost per patient including buffer stock as a covariate, to fill in missing data.

The average cost per patient including buffer stock was calculated using total expenditure on drugs from NTPs, including buffer stock, and the number of notified cases. We chose to use this covariate because more data was available and the reported cost per patient shared a statistically significant relationship with the calculated cost per patient including buffer stock when tested in natural log space. While more data on drug expenditures including buffer stock was available, the time series was not complete. To fill in missing data, we modelled the natural log-transformed average drug cost per patient including buffer stock in ST-GPR using natural log-transformed LDI per capita from GBD<sup>3</sup> as a covariate.

To adjust *Drug cost per patient*<sub>DS|MDR</sub> to reflect the share of drugs costs sourced out-of-pocket and prepaid private, we utilized  $\frac{\text{Out-of-pocket medical goods spending}}{\text{Domestic medical goods spending}}$  and  $\frac{\text{Prepaid medical goods spending}}{\text{Domestic medical goods spending}}$  data, with 537 and 505 country-year data points sourced from NHAs respectively. We used data for HC.5 (“Medical goods (non-specified by function)”) from the System of Health Accounts (SHA) 2011 framework in place of HC.5.1 (“Pharmaceuticals and other medical non-durables”) because the two codes shared a significant relationship and more data was available for HC.5.  $\frac{\text{Out-of-pocket medical goods spending}}{\text{Domestic medical goods spending}}$  and  $\frac{\text{Prepaid private medical goods spending}}{\text{Domestic medical goods spending}}$  were logit-transformed and modelled with ST-GPR. Each model used natural log-transformed LDI per capita<sup>3</sup>, random effects on country, and the logit-transformed fraction of total health spending per each source ( $\frac{\text{Out-of-pocket health spending}}{\text{Domestic health spending}}$  and

$\frac{\text{Prepaid private health spending}}{\text{Domestic health spending}}$ ) from the GBD Health Financing Collaborator Network<sup>4</sup> respectively as covariates.

### S2.3. Modeling financing sources and functions

#### S2.3.1. Modeling total government spending on tuberculosis

To estimate a full time series for all years and countries in our study with uncertainty, we modelled  $Government_{TB}$  as a share of total government spending from the GBD Health Financing Collaborator Network<sup>4</sup> with ST-GPR. We first considered the covariates in the table below:

**Table S7. Covariates considered**

| Model                               | Covariates                                                                                                                                                                                                                                                       |
|-------------------------------------|------------------------------------------------------------------------------------------------------------------------------------------------------------------------------------------------------------------------------------------------------------------|
| Out-of-pocket health spending on TB | Out-of-pocket health spending, proportion of out-of-pocket/total health spending, LDI per capita, universal health coverage, BCG vaccine coverage proportion, tuberculosis case notifications, multi-drug resistant tuberculosis patients starting treatment     |
| Government health spending on TB    | NTP spending, NTP spending per capita, case notifications per capita, average cost of an inpatient stay, average cost of an outpatient visit, LDI per capita, total health expenditure per capita, fraction of case notifications that were multi-drug resistant |

We sourced all estimates from the GBD 2017 study and the WHO Global TB Database. The first stage linear model of ST-GPR was a mixed-effect model, with the logit-transformed fraction of NTP spending/total government health expenditure, natural log-transformed case notifications and the logit-transformed fraction of case notifications that were multi-drug resistant from WHO,<sup>22</sup> and natural log-transformed LDI per capita as covariates and random effects on country. To detect and reduce the influence of outlier data points, we used the selected model to measure Cook's distance for each data point. We excluded each data point if Cook's distance was greater than  $15/n$  where  $n$  is the total number of  $Government_{TB}$  data points.

### S2.3.2. Modeling total out-of-pocket spending on tuberculosis

For our final model, we logit-transformed  $Out-of-pocket_{TB}$  as a fraction of total out-of-pocket health spending from the GBD Health Financing Collaborator Network.<sup>4</sup> To select covariates, we first conducted a lasso regression to determine which covariates were least correlated, conditional on other covariates, with the logit-transformed  $Out-of-pocket_{TB}$  fraction as the dependent variable. Covariates with an estimated coefficient of zero were removed from the set of possible covariates. We then used linear mixed effects regression to estimate all models including all possible combinations of the remaining covariates.

We then selected the 1000 best models with the lowest Akaike information criterion (AIC) and the 1000 best models with the lowest Bayesian information criterion (BIC) values. Finally, we completed a 10-fold cross-validation with out-of-sample predictions on these selected models. We selected the best model based on out-of-sample root mean squared error.

**Table S8. Top OOP spending models based on out-of-sample root-mean square error**

| Model | Covariates                                                                                                                    | OOS RMSE |
|-------|-------------------------------------------------------------------------------------------------------------------------------|----------|
| 1     | LDI per capita, universal health coverage, proportion of out-of-pocket/total health spending                                  | 0.705278 |
| 2     | LDI per capita, universal health coverage, BCG vaccine coverage proportion, proportion of out-of-pocket/total health spending | 0.705367 |
| 3     | LDI per capita, universal health coverage, out-of-pocket health spending, proportion of out-of-pocket/total health spending   | 0.705428 |
| 4     | LDI per capita, universal health coverage, tuberculosis case notifications, proportion of out-of-pocket/total health spending | 0.705434 |
| 5     | LDI per capita, universal health coverage, tuberculosis case notifications, proportion of out-of-pocket/total health spending | 0.705448 |

We used Cook's distance to detect outliers and excluded any points with a Cook's distance greater than  $15/n$ , where  $n$  is the total number of  $Out-of-pocket_{TB}$  data points.

### S2.3.3. Modeling prepaid private spending on tuberculosis

Prepaid private spending includes spending by voluntary insurance (i.e. private and not mandated) and spending from domestic non-governmental organisations. We modelled  $Prepaid\ private_{TB}$  as a logit-transformed fraction of total prepaid private health spending from the GBD Health Financing Collaborator Network.<sup>4</sup> For the linear first stage of ST-GPR, we used a mixed-effects model with the logit-transformed proportion of prepaid private/total health spending and natural log-transformed LDI per capita as covariates with random effects on country. We used Cook's distance to detect outliers and



excluded any points with a Cook's distance greater than  $15/n$ , where  $n$  is the total number of  $Prepaid\ private_{TB}$  data points.

#### S2.3.4. Modeling spending on tuberculosis by function

The following components are mutually exclusive and exhaustive of domestic spending on tuberculosis:

*Government<sub>pre-treatment DS</sub>*

*Government<sub>pre-treatment MDR</sub>*

*National Tuberculosis Program spending*

*Government inpatient spending<sub>notified cases DS</sub>*

*Government inpatient spending<sub>notified cases MDR</sub>*

*Government outpatient spending<sub>notified cases DS</sub>*

*Government outpatient spending<sub>notified cases MDR</sub>*

*Government inpatient spending<sub>non-notified cases DS</sub>*

*Government inpatient spending<sub>non-notified cases MDR</sub>*

*Government outpatient spending<sub>non-notified cases DS</sub>*

*Government outpatient spending<sub>non-notified cases MDR</sub>*

*Out-of-pocket<sub>pre-treatment DS</sub>*

*Out-of-pocket<sub>pre-treatment MDR</sub>*

*Out-of-pocket inpatient spending<sub>non-notified cases DS</sub>*

*Out-of-pocket inpatient spending<sub>non-notified cases MDR</sub>*

*Out-of-pocket outpatient spending<sub>non-notified cases DS</sub>*

*Out-of-pocket outpatient spending<sub>non-notified cases MDR</sub>*

*Out-of-pocket drug spending<sub>non-notified cases DS</sub>*

*Out-of-pocket drug spending<sub>non-notified cases MDR</sub>*

*Prepaid private<sub>pre-treatment DS</sub>*

*Prepaid private<sub>pre-treatment MDR</sub>*

*Prepaid private inpatient spending<sub>non-notified cases DS</sub>*

*Prepaid private inpatient spending<sub>non-notified cases MDR</sub>*

*Prepaid private outpatient spending<sub>non-notified cases DS</sub>*

*Prepaid private outpatient spending<sub>non-notified cases MDR</sub>*

*Preapid private drug spending<sub>non-notified cases DS</sub>*

*Prepaid private drug spending<sub>non-notified cases MDR</sub>*

To produce final estimates of each component to be able to calculate spending on health functions that scale properly to the source estimates, we calculated each component as a fraction of its corresponding financing source. For example, *Government inpatient spending<sub>notified cases DS</sub>/Government<sub>TB</sub>*. We then multiplied these proportions by our final estimates by source to get values for each component. To produce estimates by function, we aggregated each component of each function across sources, as illustrated below:

*Inpatient spending*

*= Government inpatient spending<sub>notified cases DS</sub>*  
*+ Government inpatient spending<sub>notified cases MDR</sub>*  
*+ Government inpatient spending<sub>non-notified cases DS</sub>*  
*+ Government inpatient spending<sub>non-notified cases MDR</sub>*  
*+ Out-of-pocket inpatient spending<sub>non-notified cases DS</sub>*  
*+ Out-of-pocket inpatient spending<sub>non-notified cases MDR</sub>*  
*+ Prepaid private spending<sub>non-notified cases DS</sub>*  
*+ Prepaid private spending<sub>non-notified cases MDR</sub>*

We produced function estimates for National Tuberculosis Programme spending (inclusive of development assistance and exclusive of drug spending), inpatient spending, outpatient spending, and drug spending (inclusive of both private and NTP drug spending).

Currently, we do not break down NTP spending into any further functions such as diagnostic spending, nor do we estimate spending on immunisation. These are limitations of our current estimates, but we plan to incorporate them into future work.

### S3. Currency Conversion

All TB expenditure estimates were made and reported in 2019 United States dollars (USD). Data sources reported expenditure in either nominal local currency units (LCUs) or nominal USD. To convert nominal LCUs to USD, we applied deflators to nominal LCUs to inflate to 2019 LCUs. We then applied exchange rates to produce 2019 USD. When LCUs were not reported, we extracted reported expenditure in nominal USD, applied corresponding nominal exchange rates to produce nominal LCUs, inflated nominal LCUs to 2019 LCUs with deflators, and finally exchanged 2019 LCUs to 2019 USD. All deflators and exchange rates were extracted from the World Bank, International Monetary Fund, Penn World Tables, the United Nations National Accounts and the World Health Organisation, and were imputed to provide a complete series for each of the variables between 1950 and 2019. We then used several models including ordinary least-squares regression and mixed effects models, to complete each source series. More information about the approach to converters and deflators may be found in GBD Health Financing Collaborator Network (2020)<sup>4</sup>.

## S4. Sensitivity analysis

We conducted sensitivity analyses using different key variables and data sources to test if our models were input dependent.

Model 1 below represents our primary estimates. Model 2 addresses one of our key assumptions, which is that all TB cases seek treatment. In Model 2, we assume that only 75% of non-notified cases sought treatment. Model 3 addresses another of our key assumptions, which is that non-notified cases have similar healthcare utilisation patterns as notified cases. In Model 3, we assume that health care utilisation (health facility visits and hospitalisation percentage) are 50% lower for non-notified cases than notified cases. Finally, Model 4 tests the sensitivity of our estimates to different incidence inputs. In Model 4, we use WHO reported estimates of incidence for TB instead of IHME estimates of TB incidence.

**Table S9. Sensitivity analysis model results**

|                                                                              | Model 1 |                    | Model 2 |                   | Model 3 |                  | Model 4 |                    |
|------------------------------------------------------------------------------|---------|--------------------|---------|-------------------|---------|------------------|---------|--------------------|
|                                                                              | Mean    | CI                 | Mean    | CI                | Mean    | CI               | Mean    | CI                 |
| <b>Total spend on tuberculosis in millions of USD</b>                        | 10941.9 | 10273.7 to 11753.9 | 9926.4  | 9293.9 to 10661.5 | 8270.9  | 7703.7 to 8887.5 | 10729.5 | 10073.5 to 11549.5 |
| <b>Total spend on tuberculosis per incident case in USD</b>                  | 1243    | 1167.1 to 1335.2   | 1127.6  | 1055.8 to 1211.1  | 939.6   | 875.1 to 1009.6  | 1218.9  | 1144.3 to 1312.0   |
| <b>Tuberculosis development assistance as fraction of total tuberculosis</b> | 15.8    | 14.7 to 16.8       | 17.4    | 16.2 to 18.5      | 20.8    | 19.4 to 22.4     | 16.1    | 14.9 to 17.1       |
| <b>Tuberculosis government as fraction of total tuberculosis</b>             | 63.5    | 59.2 to 66.8       | 65.5    | 61.5 to 68.6      | 59.8    | 55.9 to 63.1     | 63.3    | 59.2 to 66.6       |
| <b>Tuberculosis out-of-pocket as fraction of total tuberculosis</b>          | 18.7    | 15.2 to 23.6       | 15.5    | 12.1 to 20.2      | 17.4    | 14.1 to 22.1     | 18.6    | 15.0 to 23.3       |
| <b>Total spend on tuberculosis 2000-2017 annual growth rate</b>              | 3.9     | 3.0 to 4.6         | 4.5     | 3.7 to 5.2        | 4.4     | 3.6 to 5.2       | 4       | 3.1 to 4.8         |

Despite differences between the mean results across models, the qualitative conclusions drawn from each model remain the same, as illustrated in the figures below:

**Figure S1. Tuberculosis spending by source in 135 Low and Middle Income Countries, Model 1**

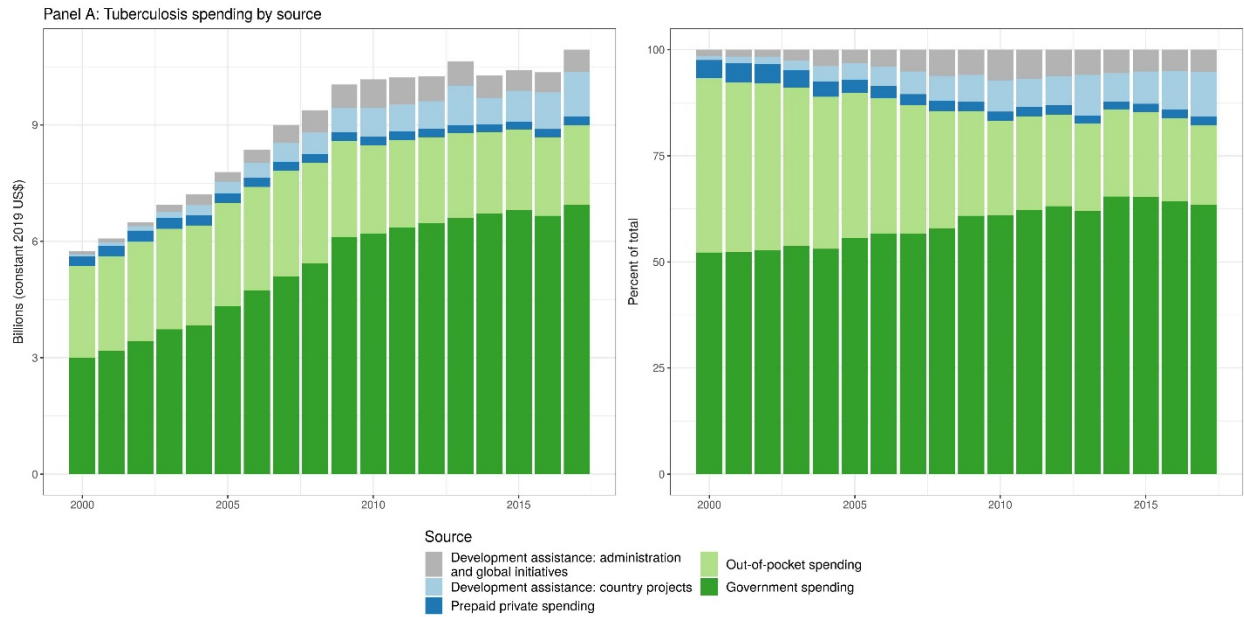

**Figure S2. Tuberculosis spending by source in 135 Low and Middle Income Countries, Model 2**

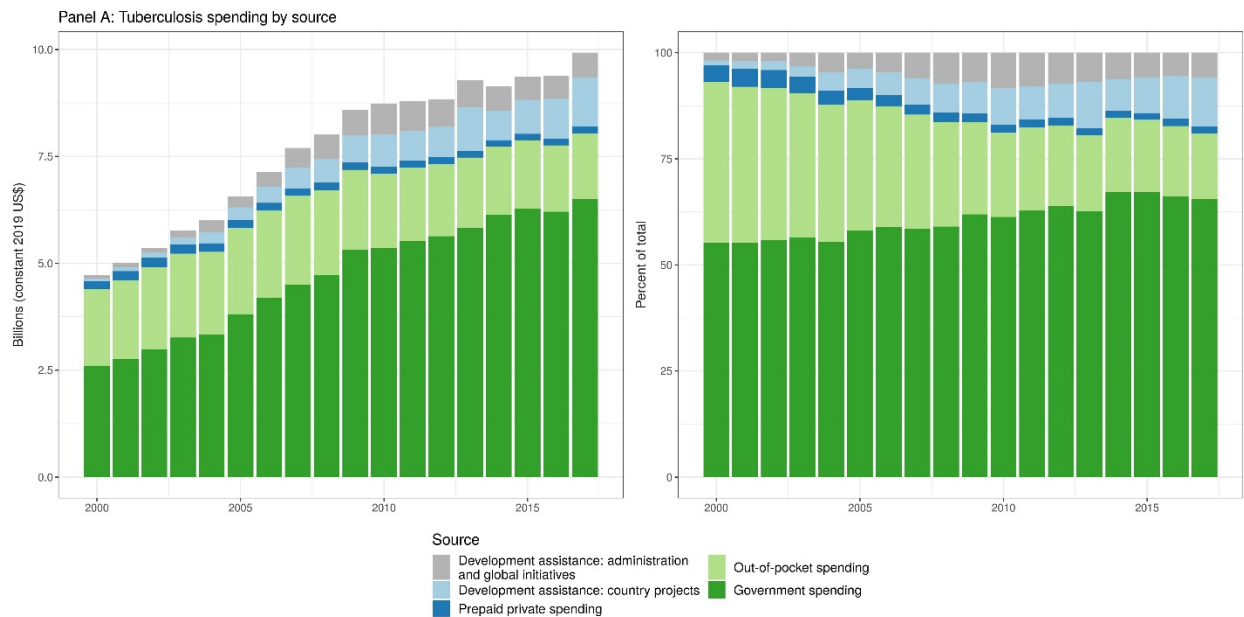

**Figure S3. Tuberculosis spending by source in 135 Low and Middle Income Countries, Model 3**

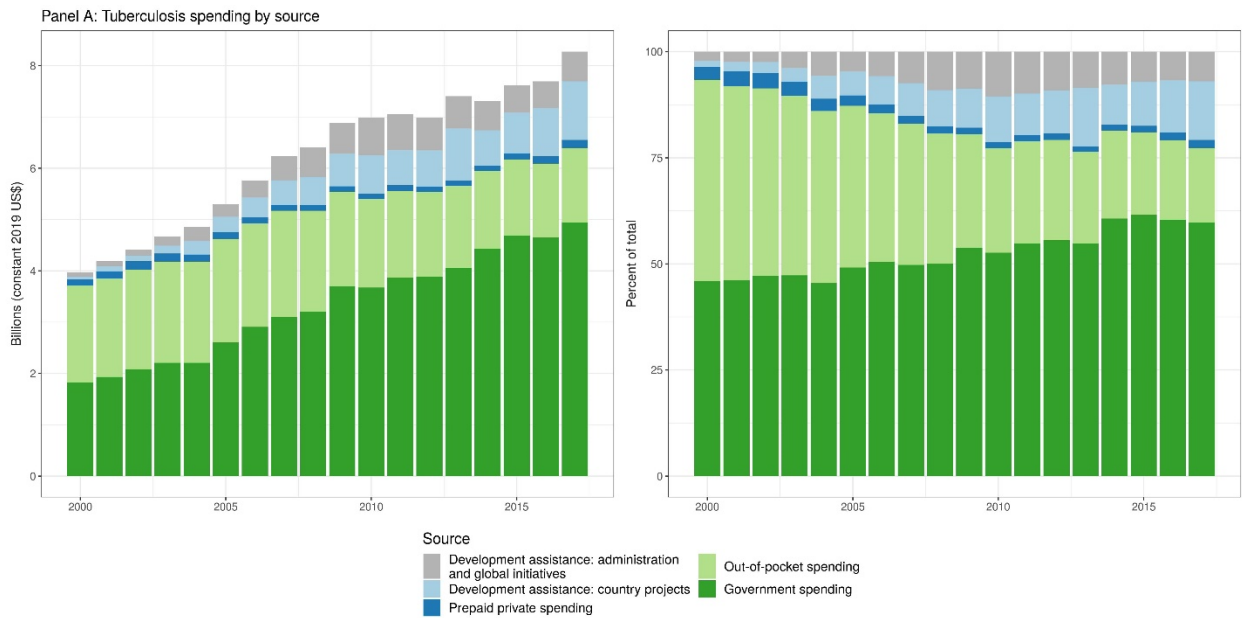

**Figure S4. Tuberculosis spending by source in 135 Low and Middle Income Countries, Model 4**

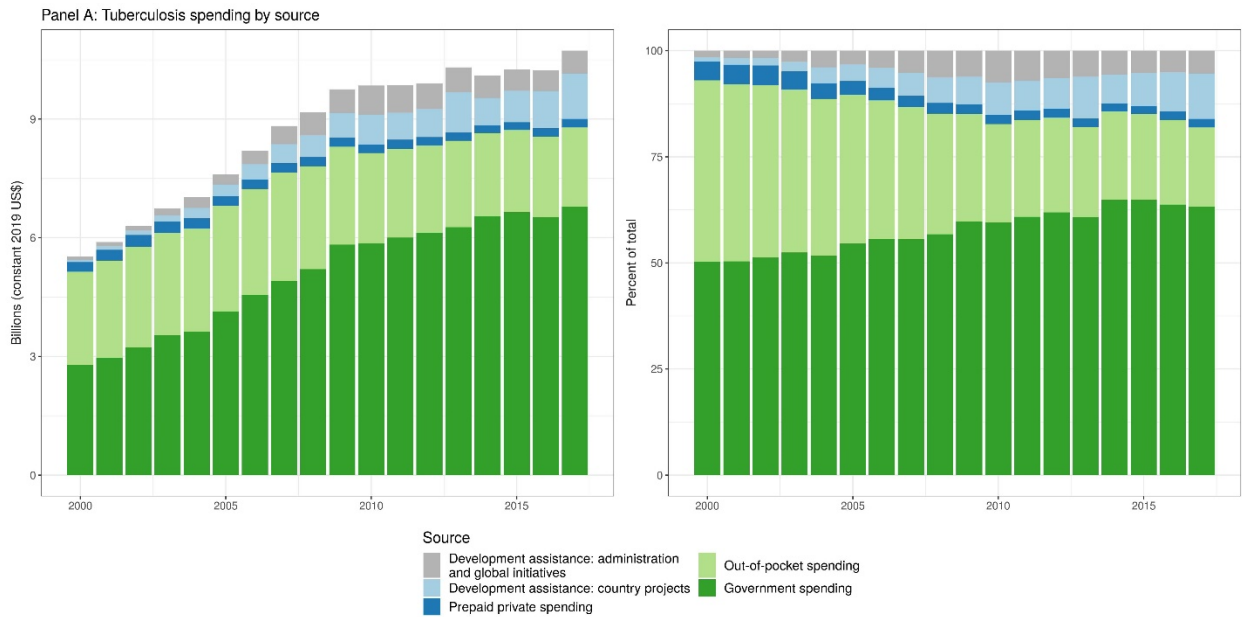

## S5. Results in purchasing power parity (PPP) dollars

**Table S10. Tuberculosis spending countries in 135 Low and Middle Income Countries, 2017**

| Location                                         | Total spend on tuberculosis in millions of PPP | Total spend on tuberculosis per incident case in PPP | Tuberculosis DAH in millions of PPP | Tuberculosis government in millions of PPP | Tuberculosis out-of-pocket in millions of PPP | Total spend on tuberculosis as a fraction of total health expenditure |
|--------------------------------------------------|------------------------------------------------|------------------------------------------------------|-------------------------------------|--------------------------------------------|-----------------------------------------------|-----------------------------------------------------------------------|
| 135 low- and middle-income countries             | 30646.4 (28568.7 to 33246.8)                   | 3013.2 (2808.9 to 3268.9)                            | 13.4 (12.4 to 14.4)                 | 62.8 (57.7 to 66.7)                        | 21.6 (17.2 to 27.5)                           | 4.2 (3.4 to 4.9)                                                      |
| India + China                                    | 9219.8 (7359.6 to 11711.4)                     | 2448.4 (1954.4 to 3110.1)                            | 4.7 (3.6 to 5.8)                    | 54.7 (41.5 to 66.1)                        | 37.9 (25.4 to 51.8)                           | 4.2 (2.0 to 6.5)                                                      |
| 28 other high-burden countries                   | 12724.4 (11731.8 to 13751.7)                   | 2708.0 (2496.8 to 2926.7)                            | 16.7 (15.4 to 18.0)                 | 64.3 (60.4 to 67.5)                        | 16.8 (13.6 to 21.2)                           | 4.0 (3.2 to 4.8)                                                      |
| Other LMICs                                      | 8126.1 (7732.7 to 8592.8)                      | 4762.6 (4532.0 to 5036.1)                            | 12.2 (11.6 to 12.8)                 | 74.6 (72.9 to 76.3)                        | 11.9 (10.5 to 13.4)                           | 4.1 (3.7 to 4.5)                                                      |
| Low-income countries                             | 2407.6 (2310.3 to 2515.6)                      | 1134.4 (1088.5 to 1185.2)                            | 33.6 (32.1 to 35.0)                 | 30.0 (28.2 to 31.8)                        | 31.4 (29.0 to 34.2)                           | 4.7 (4.3 to 5.2)                                                      |
| Lower-middle-income countries                    | 14065.6 (12287.5 to 16418.7)                   | 2267.6 (1981.0 to 2647.0)                            | 16.3 (13.9 to 18.5)                 | 47.3 (39.6 to 53.9)                        | 34.0 (25.7 to 44.0)                           | 5.7 (4.5 to 7.0)                                                      |
| Upper-middle-income countries                    | 13597.0 (12539.7 to 14805.8)                   | 7368.0 (6795.1 to 8023.0)                            | 3.3 (3.0 to 3.6)                    | 87.5 (84.0 to 90.1)                        | 7.9 (5.3 to 11.5)                             | 2.7 (1.6 to 3.7)                                                      |
| Central Europe, Eastern Europe, and Central Asia | 9709.0 (8861.5 to 10604.6)                     | 40194.5 (36685.9 to 43902.2)                         | 3.7 (3.4 to 4.1)                    | 87.5 (83.4 to 90.5)                        | 8.2 (5.3 to 12.5)                             | 4.9 (3.9 to 5.9)                                                      |
| Latin America and Caribbean                      | 1126.2 (1001.5 to 1259.6)                      | 5680.2 (5051.3 to 6352.8)                            | 4.4 (3.9 to 4.9)                    | 91.5 (89.9 to 92.8)                        | 3.4 (2.4 to 4.8)                              | 2.3 (1.3 to 3.4)                                                      |
| North Africa and Middle East                     | 1123.0 (1002.0 to 1273.6)                      | 4626.1 (4127.4 to 5246.2)                            | 10.4 (9.1 to 11.6)                  | 79.2 (75.6 to 82.4)                        | 10.0 (7.3 to 13.2)                            | 4.4 (3.2 to 5.5)                                                      |
| South Asia                                       | 8277.1 (6560.9 to 10634.4)                     | 2352.6 (1864.8 to 3022.6)                            | 10.3 (7.9 to 12.8)                  | 44.0 (32.2 to 54.7)                        | 43.1 (30.4 to 57.1)                           | 6.2 (4.0 to 8.5)                                                      |
| Southeast Asia, East Asia, and Oceania           | 4404.2 (3805.1 to 5118.8)                      | 2100.2 (1814.5 to 2441.0)                            | 13.8 (11.8 to 15.9)                 | 70.9 (64.0 to 76.6)                        | 13.4 (8.6 to 19.8)                            | 0.9 (-1.2 to 2.8)                                                     |
| Sub-Saharan Africa                               | 5270.0 (4955.9 to 5696.0)                      | 1364.4 (1283.0 to 1474.7)                            | 29.7 (27.5 to 31.6)                 | 36.7 (33.2 to 40.1)                        | 28.2 (24.4 to 33.4)                           | 4.0 (3.4 to 4.7)                                                      |
| Angola                                           | 216.6 (183.0 to 260.2)                         | 2138.0 (1806.0 to 2568.6)                            | 9.4 (7.7 to 11.0)                   | 60.0 (49.5 to 69.0)                        | 25.6 (16.2 to 37.0)                           | 9.4 (7.3 to 11.5)                                                     |
| Bangladesh                                       | 235.5 (202.4 to 279.9)                         | 1215.7 (1045.0 to 1445.2)                            | 53.9 (45.1 to 62.3)                 | 25.2 (19.2 to 32.2)                        | 20.5 (10.9 to 32.4)                           | 6.7 (4.2 to 9.3)                                                      |
| Brazil                                           | 180.6 (125.5 to 256.9)                         | 2197.5 (1527.4 to 3127.0)                            | 0.1 (0.0 to 0.1)                    | 91.5 (83.8 to 96.3)                        | 7.2 (2.8 to 14.2)                             | 0.7 (-2.4 to 3.7)                                                     |
| Cambodia                                         | 122.5 (109.6 to 137.8)                         | 3142.7 (2812.2 to 3536.9)                            | 28.9 (25.6 to 32.2)                 | 67.8 (63.8 to 71.4)                        | 3.3 (1.3 to 6.3)                              | 3.8 (2.8 to 4.8)                                                      |
| Central African Republic                         | 22.0 (20.7 to 23.7)                            | 632.6 (593.8 to 682.2)                               | 65.2 (60.4 to 69.4)                 | 12.9 (11.0 to 14.8)                        | 21.3 (16.4 to 27.0)                           | 4.5 (3.2 to 5.7)                                                      |
| China                                            | 2037.3 (1490.6 to 2755.3)                      | 2372.1 (1735.6 to 3208.1)                            | 0.6 (0.5 to 0.8)                    | 79.3 (65.6 to 89.5)                        | 17.0 (7.7 to 30.9)                            | -1.3 (-4.4 to 1.9)                                                    |
| Congo                                            | 28.1 (23.1 to 34.2)                            | 1408.3 (1157.7 to 1716.3)                            | 26.9 (21.9 to 32.4)                 | 45.3 (35.6 to 55.1)                        | 26.6 (15.6 to 39.1)                           | 4.9 (2.8 to 7.1)                                                      |
| Democratic People's Republic of Korea            | 41.3 (33.4 to 49.9)                            | 871.1 (704.8 to 1052.8)                              | 0.0 (0.0 to 0.0)                    | 95.5 (91.1 to 98.0)                        | 4.4 (1.9 to 8.8)                              | 1.9 (0.2 to 3.6)                                                      |
| Democratic Republic of the Congo                 | 112.5 (90.8 to 139.3)                          | 287.0 (231.7 to 355.4)                               | 30.5 (24.3 to 37.3)                 | 12.7 (8.4 to 17.6)                         | 52.5 (41.9 to 62.2)                           | 3.0 (1.3 to 4.8)                                                      |
| Ethiopia                                         | 333.9 (284.1 to 400.1)                         | 1453.2 (1236.4 to 1741.0)                            | 23.6 (19.5 to 27.5)                 | 41.5 (33.9 to 49.5)                        | 24.0 (14.8 to 35.9)                           | 2.5 (1.3 to 3.8)                                                      |



|                             |                           |                               |                     |                     |                     |                     |
|-----------------------------|---------------------------|-------------------------------|---------------------|---------------------|---------------------|---------------------|
| India                       | 7182.5 (5453.9 to 9512.0) | 2470.9 (1876.3 to 3272.4)     | 5.9 (4.3 to 7.6)    | 47.7 (33.7 to 61.2) | 43.8 (28.9 to 59.6) | 7.9 (4.9 to 11.0)   |
| Indonesia                   | 608.8 (487.8 to 759.9)    | 1084.5 (868.9 to 1353.6)      | 26.4 (20.9 to 32.5) | 56.8 (45.8 to 66.9) | 14.5 (6.4 to 26.8)  | 2.6 (0.3 to 4.8)    |
| Kenya                       | 155.4 (133.7 to 183.9)    | 845.0 (727.4 to 1000.2)       | 44.1 (37.0 to 50.9) | 33.5 (25.9 to 41.3) | 14.7 (7.5 to 25.1)  | 5.5 (2.8 to 8.0)    |
| Lesotho                     | 61.2 (58.1 to 64.5)       | 2347.6 (2229.5 to 2475.3)     | 70.1 (66.4 to 73.7) | 12.2 (9.0 to 15.7)  | 17.7 (14.7 to 21.0) | 12.8 (11.1 to 14.4) |
| Liberia                     | 5.8 (4.6 to 7.5)          | 518.5 (414.1 to 669.6)        | 33.1 (25.2 to 40.8) | 33.1 (23.6 to 43.3) | 30.9 (16.9 to 46.6) | 5.0 (2.3 to 7.7)    |
| Mozambique                  | 176.8 (150.9 to 207.6)    | 784.7 (669.4 to 921.2)        | 40.1 (33.9 to 46.6) | 27.6 (21.8 to 33.6) | 30.7 (20.1 to 41.0) | 8.3 (7.0 to 9.5)    |
| Myanmar                     | 285.3 (244.3 to 353.6)    | 2623.4 (2246.8 to 3251.5)     | 58.5 (46.8 to 67.7) | 15.8 (10.8 to 21.2) | 25.7 (14.8 to 40.5) | 9.5 (7.5 to 11.6)   |
| Namibia                     | 176.2 (155.2 to 198.2)    | 9176.0 (8082.6 to 10323.5)    | 13.3 (11.8 to 15.0) | 75.7 (71.5 to 79.5) | 2.2 (1.1 to 3.8)    | 12.4 (10.2 to 14.3) |
| Nigeria                     | 720.0 (504.3 to 1069.7)   | 1223.2 (856.7 to 1817.3)      | 27.7 (17.9 to 38.0) | 19.3 (11.6 to 28.1) | 51.6 (35.1 to 68.9) | 5.6 (1.9 to 9.8)    |
| Pakistan                    | 786.2 (599.9 to 1067.4)   | 2134.1 (1628.5 to 2897.5)     | 38.5 (27.7 to 49.4) | 15.1 (9.6 to 21.4)  | 43.8 (28.5 to 58.7) | -0.6 (-2.8 to 1.8)  |
| Papua New Guinea            | 28.5 (24.8 to 33.2)       | 1894.6 (1647.0 to 2205.0)     | 40.2 (34.4 to 46.0) | 57.5 (51.3 to 63.9) | 2.3 (1.1 to 4.1)    | 15.4 (13.1 to 17.8) |
| Philippines                 | 603.2 (496.0 to 721.5)    | 2542.8 (2090.9 to 3041.2)     | 22.5 (18.7 to 27.1) | 72.9 (67.0 to 77.8) | 4.1 (1.8 to 7.8)    | 7.4 (5.4 to 9.4)    |
| Russian Federation          | 5740.4 (4956.5 to 6625.4) | 52097.7 (44982.9 to 60128.8)  | 0.0 (0.0 to 0.0)    | 90.0 (83.3 to 94.8) | 9.2 (4.4 to 16.0)   | 4.9 (3.4 to 6.4)    |
| Sierra Leone                | 132.8 (119.4 to 146.8)    | 5620.4 (5052.4 to 6213.2)     | 21.5 (19.4 to 23.9) | 71.6 (67.4 to 75.0) | 3.4 (1.6 to 6.7)    | 9.1 (7.6 to 10.7)   |
| South Africa                | 908.2 (724.5 to 1138.2)   | 2097.2 (1673.0 to 2628.3)     | 25.9 (20.4 to 32.0) | 67.3 (59.3 to 74.4) | 4.0 (1.7 to 7.5)    | 1.4 (-0.4 to 3.3)   |
| Thailand                    | 102.4 (79.5 to 131.1)     | 1753.1 (1360.8 to 2244.0)     | 23.3 (17.9 to 29.5) | 64.5 (53.5 to 73.9) | 10.7 (4.5 to 21.3)  | 1.3 (-1.1 to 3.8)   |
| United Republic of Tanzania | 310.8 (272.0 to 359.0)    | 1458.1 (1276.4 to 1684.6)     | 32.3 (27.8 to 36.7) | 20.8 (15.5 to 27.2) | 38.9 (31.5 to 46.7) | 6.1 (4.6 to 7.7)    |
| Viet Nam                    | 206.1 (164.3 to 262.9)    | 1605.4 (1279.9 to 2047.6)     | 23.1 (17.9 to 28.6) | 60.1 (48.1 to 69.8) | 16.1 (7.4 to 29.1)  | 4.0 (2.0 to 6.0)    |
| Zambia                      | 270.7 (257.1 to 287.3)    | 2382.5 (2263.2 to 2529.1)     | 56.3 (53.0 to 59.3) | 12.2 (9.0 to 16.1)  | 15.9 (12.9 to 19.0) | 0.8 (0.3 to 1.3)    |
| Zimbabwe                    | 152.7 (134.3 to 175.9)    | 1145.7 (1007.8 to 1319.3)     | 34.1 (29.4 to 38.5) | 19.6 (14.8 to 25.7) | 37.0 (29.6 to 45.4) | 3.9 (1.7 to 5.8)    |
| Afghanistan                 | 118.3 (102.7 to 143.8)    | 2882.5 (2501.9 to 3503.6)     | 58.5 (47.7 to 66.9) | 19.6 (14.6 to 24.8) | 21.9 (11.0 to 36.2) | 9.6 (6.3 to 12.9)   |
| Albania                     | 10.1 (7.2 to 14.1)        | 23009.2 (16588.0 to 32182.1)  | 0.9 (0.6 to 1.3)    | 98.7 (98.1 to 99.2) | 0.3 (0.1 to 0.7)    | 8.7 (5.4 to 11.8)   |
| Algeria                     | 121.0 (85.9 to 167.7)     | 8066.9 (5726.2 to 11176.8)    | 0.0 (0.0 to 0.0)    | 99.8 (99.6 to 99.9) | 0.2 (0.1 to 0.4)    | 7.2 (4.3 to 10.1)   |
| American Samoa              | 0.1 (0.1 to 0.1)          | 8940.0 (6081.1 to 12634.6)    | 0.0 (0.0 to 0.0)    | 98.6 (97.3 to 99.4) | 1.3 (0.5 to 2.6)    | 6.4 (3.2 to 9.6)    |
| Argentina                   | 160.6 (111.3 to 233.9)    | 15940.9 (11041.4 to 23215.6)  | 0.0 (0.0 to 0.0)    | 99.8 (99.7 to 99.9) | 0.1 (0.0 to 0.2)    | 3.4 (0.4 to 6.4)    |
| Armenia                     | 23.9 (19.5 to 28.6)       | 21344.8 (17468.4 to 25524.8)  | 20.1 (16.6 to 24.3) | 76.2 (70.5 to 80.6) | 3.7 (1.6 to 7.3)    | 9.6 (7.6 to 11.7)   |
| Azerbaijan                  | 152.5 (118.6 to 198.2)    | 13312.3 (10352.0 to 17309.1)  | 20.5 (15.5 to 25.9) | 46.8 (34.0 to 58.2) | 32.5 (18.4 to 49.6) | 10.9 (8.1 to 13.9)  |
| Belarus                     | 337.9 (273.0 to 412.5)    | 91593.4 (73980.5 to 111796.5) | 2.9 (2.4 to 3.6)    | 97.0 (96.3 to 97.6) | 0.1 (0.0 to 0.1)    | 2.8 (1.1 to 4.5)    |
| Belize                      | 0.5 (0.5 to 0.6)          | 3985.1 (3400.8 to 4751.3)     | 52.6 (43.8 to 61.1) | 43.7 (34.5 to 53.0) | 3.4 (1.5 to 6.5)    | 7.4 (5.0 to 9.6)    |
| Benin                       | 36.0 (27.8 to 47.2)       | 1661.9 (1285.0 to 2178.6)     | 25.9 (19.5 to 33.0) | 27.3 (19.3 to 36.1) | 46.4 (33.3 to 60.0) | 3.6 (1.2 to 6.2)    |
| Bhutan                      | 7.2 (5.5 to 9.0)          | 6745.7 (5210.0 to 8521.2)     | 25.5 (19.8 to 32.4) | 74.2 (67.2 to 79.9) | 0.3 (0.1 to 0.6)    | 5.5 (2.9 to 8.1)    |

|                                        |                           |                                     |                        |                        |                        |                     |
|----------------------------------------|---------------------------|-------------------------------------|------------------------|------------------------|------------------------|---------------------|
| Bolivia<br>(Plurinational<br>State of) | 40.9 (33.0 to<br>51.0)    | 4246.6 (3429.8<br>to 5299.4)        | 29.6 (23.4 to<br>36.2) | 56.0 (46.0 to<br>66.1) | 13.5 (6.4 to 23.3)     | 2.7 (0.7 to 4.5)    |
| Bosnia and<br>Herzegovina              | 32.9 (23.2 to<br>44.4)    | 27535.3<br>(19439.8 to<br>37188.7)  | 0.1 (0.1 to 0.2)       | 99.1 (98.3 to<br>99.6) | 0.8 (0.3 to 1.6)       | 6.3 (3.4 to 9.4)    |
| Botswana                               | 163.9 (142.1 to<br>189.4) | 10308.8 (8934.7<br>to 11910.6)      | 6.9 (6.0 to 7.9)       | 76.2 (72.3 to<br>79.8) | 3.3 (2.3 to 4.5)       | 5.4 (4.3 to 6.6)    |
| Bulgaria                               | 57.3 (41.4 to<br>78.4)    | 38242.3<br>(27632.3 to<br>52324.6)  | 6.6 (4.7 to 8.9)       | 91.9 (88.6 to<br>94.4) | 1.5 (0.6 to 3.0)       | 0.2 (-2.2 to 2.8)   |
| Burkina Faso                           | 54.0 (41.2 to<br>71.8)    | 1033.4 (788.4 to<br>1372.2)         | 15.3 (11.3 to<br>19.6) | 31.7 (22.2 to<br>42.1) | 42.0 (27.6 to<br>56.1) | 3.7 (1.7 to 5.6)    |
| Burundi                                | 67.6 (63.3 to<br>72.4)    | 1020.1 (954.5 to<br>1091.7)         | 32.9 (30.7 to<br>35.1) | 23.2 (20.7 to<br>26.0) | 32.8 (28.8 to<br>36.9) | 3.8 (3.1 to 4.5)    |
| Cabo Verde                             | 2.5 (2.1 to 3.0)          | 3555.6 (3005.5<br>to 4200.4)        | 41.5 (34.9 to<br>48.8) | 44.5 (35.7 to<br>54.0) | 13.0 (6.5 to 22.5)     | 5.2 (3.2 to 7.3)    |
| Cameroon                               | 104.0 (65.4 to<br>160.8)  | 1468.5 (922.7 to<br>2270.4)         | 9.3 (5.7 to 14.1)      | 13.9 (7.6 to<br>21.4)  | 72.3 (58.6 to<br>83.6) | 3.6 (-0.3 to 7.5)   |
| Chad                                   | 67.4 (53.2 to<br>85.9)    | 1566.6 (1236.8<br>to 1997.1)        | 8.7 (6.7 to 10.8)      | 32.1 (24.5 to<br>41.0) | 57.2 (46.0 to<br>66.9) | 2.6 (0.6 to 4.5)    |
| Colombia                               | 182.3 (128.3 to<br>255.7) | 15868.9<br>(11169.3 to<br>22261.2)  | 0.4 (0.3 to 0.5)       | 97.1 (94.7 to<br>98.6) | 1.5 (0.6 to 3.3)       | 1.5 (-1.3 to 4.3)   |
| Comoros                                | 2.0 (1.4 to 2.8)          | 1205.7 (873.7 to<br>1748.8)         | 37.0 (24.8 to<br>49.6) | 6.5 (4.0 to 9.9)       | 54.5 (39.0 to<br>69.8) | 3.9 (-0.1 to 7.7)   |
| Costa Rica                             | 15.7 (10.6 to<br>21.7)    | 34423.2<br>(23342.4 to<br>47738.2)  | 0.0 (0.0 to 0.0)       | 99.8 (99.7 to<br>99.9) | 0.2 (0.1 to 0.3)       | 10.1 (6.8 to 13.6)  |
| Cuba                                   | 76.2 (53.4 to<br>108.5)   | 99204.2<br>(69560.9 to<br>141308.9) | 0.0 (0.0 to 0.0)       | 99.7 (99.5 to<br>99.9) | 0.2 (0.1 to 0.5)       | 6.1 (3.0 to 9.3)    |
| Côte d'Ivoire                          | 69.5 (55.1 to<br>91.1)    | 1101.6 (874.5 to<br>1443.9)         | 28.4 (21.3 to<br>35.2) | 36.1 (25.8 to<br>46.8) | 30.8 (16.5 to<br>46.7) | -0.6 (-3.3 to 2.0)  |
| Djibouti                               | 6.2 (5.4 to 7.1)          | 1504.5 (1312.0<br>to 1735.9)        | 54.2 (46.8 to<br>61.9) | 33.7 (25.5 to<br>42.4) | 11.8 (6.5 to 18.8)     | 6.6 (4.9 to 8.3)    |
| Dominica                               | 0.2 (0.1 to 0.2)          | 7589.8 (5845.5<br>to 10162.3)       | 18.6 (13.7 to<br>23.7) | 76.8 (69.4 to<br>82.9) | 4.4 (1.9 to 8.8)       | 1.4 (-1.1 to 4.2)   |
| Dominican<br>Republic                  | 55.1 (40.5 to<br>75.3)    | 8883.0 (6522.1<br>to 12140.9)       | 5.7 (4.1 to 7.6)       | 91.8 (88.5 to<br>94.5) | 1.9 (0.8 to 3.8)       | 6.5 (3.8 to 9.3)    |
| Ecuador                                | 29.6 (20.9 to<br>41.9)    | 5273.0 (3734.0<br>to 7472.1)        | 0.1 (0.0 to 0.1)       | 95.3 (90.8 to<br>98.1) | 4.1 (1.5 to 8.8)       | 2.1 (-0.8 to 4.8)   |
| Egypt                                  | 91.9 (66.8 to<br>123.5)   | 4941.8 (3589.1<br>to 6639.7)        | 0.2 (0.2 to 0.3)       | 80.4 (65.3 to<br>90.1) | 17.4 (8.0 to 31.7)     | 3.9 (1.2 to 6.6)    |
| El Salvador                            | 16.4 (13.5 to<br>20.3)    | 9414.9 (7727.2<br>to 11624.3)       | 40.6 (32.5 to<br>48.9) | 58.7 (50.3 to<br>66.8) | 0.7 (0.3 to 1.4)       | 7.7 (5.4 to 10.1)   |
| Equatorial<br>Guinea                   | 26.6 (18.7 to<br>38.1)    | 5637.9 (3962.9<br>to 8098.3)        | 0.2 (0.1 to 0.2)       | 43.2 (28.2 to<br>59.4) | 55.8 (39.4 to<br>71.1) | 8.4 (4.5 to 12.0)   |
| Eritrea                                | 17.6 (14.9 to<br>20.4)    | 605.5 (514.5 to<br>703.4)           | 9.5 (8.2 to 11.1)      | 10.4 (7.1 to<br>14.7)  | 76.9 (71.5 to<br>81.1) | 1.7 (0.3 to 3.2)    |
| Eswatini                               | 49.4 (45.5 to<br>54.4)    | 4520.0 (4158.0<br>to 4973.2)        | 41.7 (37.8 to<br>45.2) | 22.7 (17.6 to<br>29.2) | 27.4 (23.7 to<br>31.0) | 14.5 (12.2 to 16.6) |
| Fiji                                   | 7.0 (5.5 to 8.8)          | 20864.7<br>(16478.5 to<br>26255.1)  | 18.4 (14.5 to<br>23.0) | 81.4 (76.8 to<br>85.4) | 0.1 (0.0 to 0.2)       | 5.5 (3.3 to 7.7)    |
| Gabon                                  | 10.0 (7.4 to<br>13.1)     | 1715.6 (1267.1<br>to 2251.5)        | 6.4 (4.7 to 8.4)       | 84.8 (77.1 to<br>90.0) | 6.3 (2.7 to 12.9)      | -1.9 (-4.2 to 0.5)  |
| Gambia                                 | 22.9 (22.0 to<br>24.2)    | 3959.0 (3791.3<br>to 4175.4)        | 73.7 (69.8 to<br>76.9) | 16.5 (14.2 to<br>18.9) | 7.9 (4.6 to 12.2)      | 9.0 (7.9 to 10.0)   |
| Georgia                                | 65.0 (50.3 to<br>83.2)    | 23867.8<br>(18490.6 to<br>30583.5)  | 24.7 (19.0 to<br>31.4) | 71.7 (64.4 to<br>78.6) | 3.1 (1.4 to 6.2)       | 5.7 (3.2 to 8.3)    |
| Ghana                                  | 98.8 (79.0 to<br>128.9)   | 1163.8 (930.9 to<br>1518.9)         | 37.7 (28.4 to<br>46.4) | 24.6 (16.8 to<br>32.6) | 34.3 (21.0 to<br>50.0) | 7.1 (3.5 to 10.7)   |
| Grenada                                | 0.2 (0.1 to 0.2)          | 13881.3<br>(10612.4 to<br>18003.9)  | 18.2 (13.8 to<br>23.4) | 76.8 (69.5 to<br>82.6) | 4.8 (2.0 to 9.4)       | -3.2 (-5.5 to -0.6) |
| Guatemala                              | 15.1 (10.8 to<br>20.4)    | 4359.8 (3100.7<br>to 5878.5)        | 4.8 (3.5 to 6.6)       | 87.2 (79.7 to<br>92.3) | 7.4 (3.1 to 14.8)      | 1.3 (-1.4 to 4.1)   |

|                                  |                          |                               |                     |                     |                     |                     |
|----------------------------------|--------------------------|-------------------------------|---------------------|---------------------|---------------------|---------------------|
| Guinea                           | 22.2 (17.5 to 29.5)      | 681.8 (538.3 to 905.1)        | 36.8 (27.2 to 45.8) | 17.5 (11.7 to 23.9) | 40.5 (25.6 to 56.2) | 3.8 (0.8 to 7.0)    |
| Guinea-Bissau                    | 12.4 (10.8 to 14.7)      | 2569.2 (2250.0 to 3044.4)     | 54.4 (45.6 to 61.7) | 20.9 (16.8 to 24.9) | 23.7 (14.4 to 35.6) | 7.1 (4.9 to 9.4)    |
| Guyana                           | 1.8 (1.4 to 2.4)         | 3858.6 (2971.7 to 5014.4)     | 24.8 (18.7 to 31.6) | 74.8 (68.0 to 81.0) | 0.4 (0.2 to 0.8)    | 5.6 (2.4 to 8.7)    |
| Haiti                            | 4.2 (3.2 to 5.3)         | 447.6 (347.6 to 573.0)        | 11.9 (9.1 to 15.1)  | 86.6 (82.8 to 89.8) | 1.5 (0.6 to 2.9)    | 4.6 (2.2 to 7.0)    |
| Honduras                         | 13.1 (10.4 to 16.3)      | 3983.8 (3182.2 to 4970.1)     | 33.2 (26.3 to 41.1) | 61.6 (52.1 to 69.8) | 4.9 (2.0 to 9.6)    | 3.4 (1.3 to 5.6)    |
| Iran (Islamic Republic of)       | 241.4 (168.0 to 343.9)   | 18634.9 (12968.2 to 26549.3)  | 0.0 (0.0 to 0.0)    | 99.4 (98.7 to 99.7) | 0.6 (0.2 to 1.3)    | 9.2 (6.1 to 12.2)   |
| Iraq                             | 100.7 (77.1 to 134.0)    | 6048.8 (4635.6 to 8051.2)     | 7.8 (5.8 to 10.0)   | 78.0 (67.0 to 86.0) | 14.1 (6.6 to 25.7)  | 7.0 (4.1 to 9.7)    |
| Jamaica                          | 8.4 (6.1 to 11.3)        | 17756.3 (12784.8 to 23799.0)  | 0.0 (0.0 to 0.0)    | 86.9 (78.2 to 93.0) | 9.3 (4.0 to 17.7)   | -1.0 (-3.5 to 1.6)  |
| Jordan                           | 7.8 (5.8 to 10.2)        | 7264.2 (5448.5 to 9477.0)     | 16.4 (12.3 to 21.5) | 65.8 (53.7 to 75.6) | 14.2 (6.3 to 26.4)  | 0.6 (-1.8 to 3.2)   |
| Kazakhstan                       | 1186.6 (953.9 to 1467.5) | 85498.1 (68731.7 to 105742.4) | 2.5 (2.0 to 3.1)    | 97.1 (96.3 to 97.7) | 0.1 (0.0 to 0.1)    | 4.1 (2.6 to 5.7)    |
| Kiribati                         | 1.3 (1.1 to 1.6)         | 4239.3 (3496.3 to 5081.1)     | 30.6 (25.3 to 36.8) | 69.2 (63.0 to 74.6) | 0.2 (0.1 to 0.3)    | 4.1 (2.3 to 6.0)    |
| Kyrgyzstan                       | 160.0 (143.6 to 177.7)   | 22552.5 (20243.0 to 25059.2)  | 22.3 (20.0 to 24.7) | 67.4 (62.2 to 71.5) | 10.3 (6.4 to 15.9)  | 8.1 (7.0 to 9.3)    |
| Lao People's Democratic Republic | 20.1 (16.4 to 24.5)      | 2026.2 (1656.6 to 2473.6)     | 25.8 (20.9 to 31.3) | 59.5 (50.4 to 67.9) | 13.7 (6.8 to 23.9)  | 2.7 (0.6 to 4.7)    |
| Lebanon                          | 12.3 (9.0 to 16.5)       | 7546.8 (5543.9 to 10127.4)    | 7.6 (5.5 to 10.0)   | 79.9 (70.3 to 86.9) | 8.9 (3.9 to 17.4)   | -0.1 (-2.8 to 2.6)  |
| Libya                            | 14.8 (10.3 to 20.6)      | 7680.4 (5365.9 to 10705.7)    | 0.0 (0.0 to 0.0)    | 99.2 (98.4 to 99.6) | 0.6 (0.2 to 1.3)    | 0.4 (-2.5 to 3.4)   |
| Madagascar                       | 25.7 (20.3 to 32.7)      | 521.4 (412.9 to 663.1)        | 17.4 (13.5 to 21.6) | 44.3 (32.7 to 56.4) | 25.7 (14.2 to 40.0) | 3.3 (1.0 to 5.7)    |
| Malawi                           | 95.0 (88.9 to 102.0)     | 1006.0 (941.3 to 1080.8)      | 65.2 (60.6 to 69.6) | 9.1 (6.4 to 12.5)   | 24.2 (19.8 to 28.8) | 6.8 (6.2 to 7.5)    |
| Malaysia                         | 257.8 (186.4 to 345.2)   | 13952.4 (10087.8 to 18680.6)  | 0.0 (0.0 to 0.0)    | 98.9 (97.8 to 99.5) | 0.9 (0.4 to 1.9)    | 7.8 (5.1 to 10.7)   |
| Maldives                         | 1.9 (1.3 to 2.7)         | 10288.7 (7077.2 to 14457.8)   | 0.0 (0.0 to 0.0)    | 98.2 (96.6 to 99.3) | 1.3 (0.5 to 2.8)    | 5.5 (2.6 to 8.4)    |
| Mali                             | 37.4 (27.8 to 51.4)      | 1329.3 (989.5 to 1828.6)      | 0.4 (0.3 to 0.5)    | 39.3 (25.9 to 52.8) | 56.4 (42.0 to 70.4) | 4.9 (1.5 to 8.5)    |
| Marshall Islands                 | 0.8 (0.6 to 1.1)         | 8111.9 (5830.1 to 10828.1)    | 4.3 (3.1 to 5.8)    | 95.1 (93.3 to 96.5) | 0.5 (0.2 to 1.0)    | 5.2 (2.5 to 7.9)    |
| Mauritania                       | 7.6 (5.9 to 10.3)        | 1752.6 (1349.5 to 2375.7)     | 28.6 (20.7 to 36.5) | 31.7 (21.3 to 43.2) | 37.7 (23.4 to 54.8) | 8.5 (4.5 to 12.2)   |
| Mauritius                        | 2.7 (2.0 to 3.7)         | 10827.9 (7883.6 to 14618.5)   | 8.2 (5.9 to 10.9)   | 86.9 (80.8 to 91.5) | 4.9 (1.9 to 9.8)    | 5.1 (2.5 to 7.8)    |
| Mexico                           | 118.7 (78.5 to 163.7)    | 5448.6 (3602.3 to 7513.6)     | 0.8 (0.6 to 1.2)    | 99.0 (98.5 to 99.3) | 0.1 (0.0 to 0.1)    | 2.5 (-0.4 to 5.4)   |
| Micronesia (Federated States of) | 0.0 (0.0 to 0.0)         | 307.6 (261.0 to 364.8)        | 53.4 (44.6 to 62.4) | 45.9 (36.8 to 55.0) | 0.8 (0.3 to 1.6)    | 5.4 (2.9 to 7.8)    |
| Mongolia                         | 57.3 (48.3 to 68.2)      | 11281.5 (9503.0 to 13419.8)   | 20.1 (16.7 to 23.6) | 72.5 (66.8 to 77.7) | 7.1 (3.7 to 12.0)   | 8.2 (6.3 to 10.3)   |
| Montenegro                       | 2.6 (1.8 to 3.5)         | 26025.5 (17951.6 to 36077.0)  | 0.4 (0.3 to 0.5)    | 98.9 (98.1 to 99.4) | 0.7 (0.3 to 1.4)    | -0.3 (-2.9 to 2.4)  |
| Morocco                          | 89.8 (66.3 to 119.6)     | 1760.2 (1298.8 to 2343.4)     | 3.8 (2.8 to 5.0)    | 78.0 (63.8 to 87.4) | 17.6 (8.3 to 31.9)  | 3.5 (0.5 to 6.4)    |
| Nepal                            | 65.9 (51.3 to 84.7)      | 1359.7 (1058.6 to 1748.5)     | 2.1 (1.6 to 2.7)    | 70.5 (56.5 to 81.5) | 25.3 (14.0 to 39.9) | 3.9 (1.3 to 6.4)    |
| Nicaragua                        | 23.0 (18.6 to 28.6)      | 10870.6 (8817.6 to 13539.4)   | 36.4 (28.9 to 44.3) | 63.1 (55.2 to 70.7) | 0.5 (0.2 to 1.0)    | 13.8 (11.3 to 16.5) |
| Niger                            | 13.7 (8.3 to 21.9)       | 345.4 (208.8 to 554.0)        | 7.9 (4.6 to 12.2)   | 20.0 (10.7 to 32.4) | 70.7 (54.8 to 83.9) | 3.5 (-0.9 to 8.2)   |

|                                  |                        |                              |                     |                     |                     |                      |
|----------------------------------|------------------------|------------------------------|---------------------|---------------------|---------------------|----------------------|
| North Macedonia                  | 5.5 (4.0 to 7.4)       | 9611.4 (7011.1 to 12983.7)   | 4.1 (2.9 to 5.4)    | 83.2 (72.9 to 89.9) | 11.6 (5.2 to 21.7)  | -0.8 (-3.3 to 1.8)   |
| Palestine                        | 0.9 (0.6 to 1.2)       | 1351.8 (953.7 to 1881.8)     | 0.0 (0.0 to 0.0)    | 92.8 (86.1 to 96.9) | 4.5 (1.7 to 9.3)    | 5.6 (2.6 to 8.5)     |
| Paraguay                         | 28.1 (21.5 to 36.1)    | 8312.3 (6358.1 to 10700.6)   | 16.6 (12.7 to 21.3) | 71.4 (61.0 to 79.6) | 10.8 (4.8 to 20.6)  | 6.7 (4.4 to 9.3)     |
| Peru                             | 273.9 (200.0 to 363.9) | 9688.2 (7074.7 to 12869.4)   | 1.9 (1.4 to 2.5)    | 95.5 (92.7 to 97.2) | 2.4 (1.0 to 4.9)    | 4.6 (2.3 to 7.0)     |
| Republic of Moldova              | 97.1 (83.8 to 111.6)   | 29818.3 (25743.9 to 34285.7) | 17.6 (15.2 to 20.2) | 79.0 (75.4 to 82.1) | 2.4 (1.1 to 4.5)    | 10.4 (8.7 to 12.4)   |
| Romania                          | 236.6 (172.2 to 328.8) | 18917.6 (13766.7 to 26286.9) | 3.9 (2.8 to 5.3)    | 95.9 (94.5 to 97.1) | 0.2 (0.1 to 0.4)    | 0.9 (-1.7 to 3.7)    |
| Rwanda                           | 63.9 (57.6 to 70.8)    | 1388.8 (1252.3 to 1539.6)    | 41.7 (37.6 to 46.2) | 34.6 (28.8 to 40.8) | 13.0 (9.6 to 17.3)  | 4.7 (3.9 to 5.6)     |
| Saint Lucia                      | 0.3 (0.2 to 0.4)       | 9497.0 (7063.8 to 12888.5)   | 11.5 (8.3 to 15.1)  | 83.3 (76.7 to 88.3) | 4.8 (1.9 to 10.0)   | 1.9 (-0.7 to 4.8)    |
| Saint Vincent and the Grenadines | 0.2 (0.2 to 0.3)       | 7885.4 (5919.4 to 10240.9)   | 17.9 (13.5 to 23.4) | 77.5 (70.4 to 83.2) | 4.3 (1.9 to 8.8)    | 2.0 (-0.4 to 4.6)    |
| Samoa                            | 0.2 (0.1 to 0.2)       | 2387.5 (1775.9 to 3146.1)    | 14.2 (10.6 to 18.7) | 78.2 (70.2 to 84.6) | 5.0 (2.0 to 10.6)   | 2.0 (-0.6 to 4.6)    |
| Sao Tome and Principe            | 1.4 (1.3 to 1.5)       | 6708.4 (6192.4 to 7356.6)    | 46.5 (42.3 to 50.2) | 19.1 (14.0 to 25.2) | 7.0 (3.1 to 13.3)   | -6.7 (-8.7 to -4.1)  |
| Senegal                          | 28.9 (23.3 to 36.5)    | 954.9 (767.5 to 1203.0)      | 30.6 (24.0 to 37.6) | 41.7 (31.5 to 52.5) | 24.4 (12.1 to 40.0) | 3.4 (0.7 to 6.0)     |
| Serbia                           | 43.5 (30.8 to 60.7)    | 19708.7 (13935.5 to 27463.9) | 0.1 (0.0 to 0.1)    | 96.6 (93.2 to 98.6) | 3.3 (1.3 to 6.6)    | 3.5 (0.8 to 6.1)     |
| Solomon Islands                  | 2.2 (2.0 to 2.4)       | 4718.0 (4233.4 to 5266.8)    | 59.9 (53.5 to 66.5) | 39.8 (33.1 to 46.3) | 0.3 (0.1 to 0.5)    | 8.5 (6.6 to 10.6)    |
| Somalia                          | 48.2 (45.8 to 50.8)    | 951.0 (904.2 to 1003.7)      | 63.6 (60.2 to 66.9) | 7.8 (6.5 to 9.1)    | 27.9 (24.4 to 31.6) | 8.5 (7.5 to 9.6)     |
| South Sudan                      | 135.6 (126.7 to 144.8) | 4318.0 (4032.6 to 4610.1)    | 40.2 (37.6 to 43.0) | 6.2 (5.0 to 7.8)    | 47.0 (43.3 to 50.6) | 7.2 (5.6 to 9.1)     |
| Sri Lanka                        | 65.5 (46.1 to 90.8)    | 6529.3 (4588.5 to 9041.9)    | 9.2 (6.4 to 12.6)   | 88.5 (84.0 to 92.1) | 2.1 (0.9 to 4.4)    | -7.6 (-10.3 to -5.1) |
| Sudan                            | 57.4 (44.6 to 75.8)    | 1593.8 (1237.2 to 2102.7)    | 41.7 (31.1 to 52.8) | 24.2 (15.9 to 33.4) | 32.6 (16.8 to 50.2) | 5.7 (2.8 to 8.8)     |
| Suriname                         | 2.5 (2.3 to 2.8)       | 20912.5 (18893.1 to 23631.1) | 69.5 (61.3 to 76.6) | 30.1 (22.9 to 38.4) | 0.2 (0.1 to 0.4)    | 8.1 (5.8 to 10.4)    |
| Syrian Arab Republic             | 40.6 (31.6 to 51.1)    | 10603.7 (8269.2 to 13339.6)  | 23.2 (18.1 to 29.3) | 59.8 (49.4 to 69.4) | 16.1 (8.1 to 27.2)  | -0.2 (-2.6 to 2.3)   |
| Tajikistan                       | 119.8 (106.8 to 137.3) | 12191.3 (10860.5 to 13964.9) | 55.7 (48.5 to 62.3) | 30.4 (24.1 to 37.5) | 13.8 (7.6 to 22.8)  | 10.6 (9.0 to 12.1)   |
| Timor-Leste                      | 8.5 (7.0 to 10.4)      | 4088.5 (3373.6 to 5004.7)    | 46.4 (37.6 to 55.7) | 53.0 (43.6 to 62.0) | 0.4 (0.2 to 0.9)    | 8.6 (6.6 to 10.7)    |
| Togo                             | 14.5 (11.2 to 19.7)    | 801.8 (617.6 to 1085.1)      | 36.0 (26.0 to 45.7) | 18.6 (12.0 to 26.0) | 40.1 (25.4 to 57.2) | 4.9 (1.7 to 8.3)     |
| Tonga                            | 0.3 (0.2 to 0.3)       | 7366.4 (5610.1 to 9606.0)    | 9.5 (7.1 to 12.2)   | 68.3 (56.5 to 78.7) | 21.5 (11.7 to 34.0) | 4.1 (1.5 to 6.9)     |
| Tunisia                          | 6.3 (4.4 to 8.8)       | 1988.8 (1387.7 to 2765.7)    | 0.3 (0.2 to 0.5)    | 94.5 (89.3 to 97.4) | 5.0 (2.0 to 10.0)   | 4.7 (1.6 to 7.7)     |
| Turkey                           | 212.6 (148.5 to 303.4) | 9303.6 (6498.2 to 13275.8)   | 0.0 (0.0 to 0.0)    | 97.3 (94.5 to 98.8) | 2.4 (1.0 to 5.2)    | 0.9 (-1.7 to 3.9)    |
| Turkmenistan                     | 41.7 (32.5 to 52.6)    | 10203.0 (7958.5 to 12866.6)  | 14.0 (10.9 to 17.7) | 66.9 (53.0 to 76.7) | 18.5 (9.2 to 32.3)  | 6.9 (4.7 to 9.1)     |
| Uganda                           | 181.8 (148.6 to 233.5) | 893.0 (730.0 to 1147.3)      | 39.4 (30.2 to 47.5) | 17.4 (12.4 to 23.4) | 40.8 (28.2 to 54.1) | 2.9 (1.2 to 4.8)     |
| Ukraine                          | 708.0 (578.7 to 874.8) | 22770.7 (18612.0 to 28136.4) | 6.5 (5.2 to 7.9)    | 88.6 (84.3 to 91.8) | 4.8 (2.2 to 9.2)    | 4.1 (2.1 to 6.3)     |
| Uzbekistan                       | 630.5 (507.6 to 769.5) | 32239.4 (25959.3 to 39349.1) | 11.7 (9.5 to 14.4)  | 67.9 (57.2 to 76.3) | 20.2 (12.0 to 31.0) | 9.6 (7.5 to 11.7)    |
| Vanuatu                          | 0.5 (0.4 to 0.7)       | 2649.6 (1968.5 to 3545.6)    | 3.3 (2.4 to 4.3)    | 92.4 (88.7 to 95.0) | 3.8 (1.7 to 6.8)    | 4.8 (2.2 to 7.6)     |

|                                          |                        |                              |                        |                        |                        |                     |
|------------------------------------------|------------------------|------------------------------|------------------------|------------------------|------------------------|---------------------|
| Venezuela<br>(Bolivarian<br>Republic of) | 39.4 (28.0 to<br>53.5) | 5396.9 (3833.0<br>to 7313.4) | 0.0 (0.0 to 0.0)       | 89.5 (80.4 to<br>95.0) | 5.6 (2.3 to 11.5)      | -5.6 (-8.2 to -2.8) |
| Yemen                                    | 7.2 (4.9 to 10.9)      | 441.4 (299.5 to<br>668.9)    | 23.2 (14.7 to<br>32.8) | 23.3 (13.6 to<br>35.1) | 52.9 (34.6 to<br>70.8) | -3.1 (-6.1 to 0.1)  |

Note:

Notified treated cases were reported by the ministry of health from each country to WHO. Non-notified treated cases were estimated by incidence net notification.

Tuberculosis development assistance for health (DAH) for 135 low- and middle-income countries includes spending on two parts: 1. Administration and global projects and 2. Country projects. Except that, Tuberculosis DAH only includes spending on country-specific projects for country groups and individual countries.

All countries in high burden country grouping are listed alphabetically and all remaining countries are listed alphabetically.

## S6. How these estimates might be used

We expect that a panel of estimated data regarding total TB spending, consisting of four sources, for each low- and middle-income country (LMIC) and each year, would be used by academics, policy makers, practitioners, and other stakeholders. All the estimates are available to the public in 2019 USD, PPP, and as percentage of GDP. We expect that the estimates with uncertainty intervals, available through Global Health Data Exchange (GHDx) for the public, will enable a wide range use. For policy makers, we also have an interactive website for visualisation and use cases by policy makers and practitioners. In addition, we put all scientific evidence into lay language in our policy report “Financing Global Health,” for the broader audience who may or may not have academic interest to specify the underlying methods.

## References for appendix

- 1 Jacquet V, Morose W, Schwartzman K, *et al.* Impact of DOTS expansion on tuberculosis related outcomes and costs in Haiti. *BMC Public Health* 2006; **6**: 209.
- 2 Collins D, Beyene D, Tedla Y, Diro E, Mesfin H, Levin A. Costs faced by multi-drug resistant tuberculosis patients during diagnosis and treatment. Report from a pilot study in Ethiopia. TB CARE I – Management Sciences for Health. Submitted to USAID by Management Sciences for Health for the TB CARE I Project., 2013  
[https://www.challengeb.org/publications/tools/costing/Costs\\_Faced\\_by\\_MDR-TB\\_Patients\\_During\\_Diagnosis\\_and\\_Treatment\\_Ethiopia.pdf](https://www.challengeb.org/publications/tools/costing/Costs_Faced_by_MDR-TB_Patients_During_Diagnosis_and_Treatment_Ethiopia.pdf) (accessed May 9, 2019).
- 3 Abate KH, Abay SM, Abbafati C, *et al.* Global, regional, and national age-sex-specific mortality and life expectancy, 1950–2017: a systematic analysis for the Global Burden of Disease Study 2017. *The Lancet* 2018; **392**: 1684–735.
- 4 Global Burden of Disease Health Financing Collaborator Network. Health spending for Sustainable Development Goal 3: total, HIV/AIDS, tuberculosis, malaria, universal health service coverage, financial risk protection, and donor spending, 2000 to 2030 and 2050. 2019; published online Dec 13.
- 5 Ananthakrishnan R, Muniyandi M, Jeyaraj A, Palani G, Sathiyasekaran BWC. Expenditure Pattern for TB Treatment among Patients Registered in an Urban Government DOTS Program in Chennai City, South India. *Tuberc Res Treat* 2012; **2012**. DOI:10.1155/2012/747924.
- 6 Aspler A, Menzies D, Oxlade O, *et al.* Cost of tuberculosis diagnosis and treatment from the patient perspective in Lusaka, Zambia. *Int J Tuberc Lung Dis Off J Int Union Tuberc Lung Dis* 2008; **12**: 928–35.
- 7 Asres A, Jerene D, Deressa W. Pre- and post-diagnosis costs of tuberculosis to patients on Directly Observed Treatment Short course in districts of southwestern Ethiopia: a longitudinal study. *J Health Popul Nutr* 2018; **37**: 15.
- 8 Fuady A, Houweling TAJ, Mansyur M, Richardus JH. Catastrophic total costs in tuberculosis-affected households and their determinants since Indonesia’s implementation of universal health coverage. *Infect Dis Poverty* 2018; **7**. DOI:10.1186/s40249-017-0382-3.
- 9 Jackson S, Sleigh AC, Wang GJ, Liu XL. Poverty and the economic effects of TB in rural China. *Int J Tuberc Lung Dis Off J Int Union Tuberc Lung Dis* 2006; **10**: 1104–10.
- 10 John KR, Daley P, Kincler N, Oxlade O, Menzies D. Costs incurred by patients with pulmonary tuberculosis in rural India. *Int J Tuberc Lung Dis Off J Int Union Tuberc Lung Dis* 2009; **13**: 1281–7.
- 11 Laokri S, Amoussouhui A, Ouendo EM, *et al.* A Care Pathway Analysis of Tuberculosis Patients in Benin: Highlights on Direct Costs and Critical Stages for an Evidence-Based Decision-Making. *PLoS ONE* 2014; **9**. DOI:10.1371/journal.pone.0096912.
- 12 Mahendradhata Y, Probandari A, Ahmad RA, *et al.* The Incremental Cost-Effectiveness of Engaging Private Practitioners to Refer Tuberculosis Suspects to DOTS Services in Jogjakarta, Indonesia. *Am J Trop Med Hyg* 2010; **82**: 1131–9.

- 13 Mauch V, Bonsu F, Gyapong M, *et al.* Free tuberculosis diagnosis and treatment are not enough: patient cost evidence from three continents. *Int J Tuberc Lung Dis Off J Int Union Tuberc Lung Dis* 2013; **17**: 381–7.
- 14 Othman GQ, Ibrahim MIM, Raja'a YA. Costs associated with tuberculosis diagnosis and treatment in Yemen for patients and public health services. *East Mediterr Health J Rev Sante Mediterr Orient Al-Majallah Al-Sihhiyah Li-Sharq Al-Mutawassit* 2012; **18**: 393–8.
- 15 Pantoja A, Floyd K, Unnikrishnan KP, *et al.* Economic evaluation of public-private mix for tuberculosis care and control, India. Part I. Socio-economic profile and costs among tuberculosis patients. *Int J Tuberc Lung Dis Off J Int Union Tuberc Lung Dis* 2009; **13**: 698–704.
- 16 The First Kenya Tuberculosis Patient Cost Survey 2017. The National Tuberculosis, Leprosy and Lung Disease Program <https://www.chskenya.org/wp-content/uploads/2018/07/TB-Patient-Cost-Survey-2018.pdf> (accessed May 10, 2019).
- 17 Pichenda K, Nakamura K, Morita A, Kizuki M, Seino K, Takano T. Non-hospital DOT and early diagnosis of tuberculosis reduce costs while achieving treatment success. *Int J Tuberc Lung Dis Off J Int Union Tuberc Lung Dis* 2012; **16**: 828–34.
- 18 Prasanna T, Jeyashree K, Chinnakali P, Bahurupi Y, Vasudevan K, Das M. Catastrophic costs of tuberculosis care: a mixed methods study from Puducherry, India. *Glob Health Action* 2018; **11**. DOI:10.1080/16549716.2018.1477493.
- 19 Rouzier VA, Oxlade O, Verduga R, Gresely L, Menzies D. Patient and family costs associated with tuberculosis, including multidrug-resistant tuberculosis, in Ecuador. *Int J Tuberc Lung Dis Off J Int Union Tuberc Lung Dis* 2010; **14**: 1316–22.
- 20 Vassall A, Chechulin Y, Raykhert I, *et al.* Reforming tuberculosis control in Ukraine: results of pilot projects and implications for the national scale-up of DOTS. *Health Policy Plan* 2009; **24**: 55–62.
- 21 Xu B, Dong HJ, Zhao Q, Bogg L. DOTS in China – removing barriers or moving barriers? *Health Policy Plan* 2006; **21**: 365–72.
- 22 WHO. Global Tuberculosis Report 2019. Geneva: World Health Organisation, 2019 <https://apps.who.int/iris/bitstream/handle/10665/329368/9789241565714-eng.pdf?ua=1> (accessed Oct 25, 2019).
- 23 Stenberg K, Lauer JA, Gkountouras G, Fitzpatrick C, Stanciole A. Econometric estimation of WHO-CHOICE country-specific costs for inpatient and outpatient health service delivery. *Cost Eff Resour Alloc* 2018; **16**: 11.
- 24 Moses MW, Pedroza P, Baral R, *et al.* Funding and services needed to achieve universal health coverage: applications of global, regional, and national estimates of utilisation of outpatient visits and inpatient admissions from 1990 to 2016, and unit costs from 1995 to 2016. *Lancet Public Health* 2019; **4**: e49–73.
